# Supplementary material
Source: PubMed Central journal article supplement (PMC2834543)
Supplement: ASN.2009070728_1.pdf [file ASN.2009070728_1.pdf]

**Supplementary Table 1:** List of phosphopeptides quantified by mass spectrometry that did not change significantly with dDAVP exposure. Mean and standard error (SE) values are calculated from  $\log_2(D/C)$ , where D and C are areas of the reconstructed ion chromatograms for dDAVP-treated and control samples, respectively. Note: Phosphorylation sites were not scored, despite confidence in phosphopeptide identification.

| #  | Name                                                                   | Sequence                                          | Accession #  | Mean $\pm$ SE    |
|----|------------------------------------------------------------------------|---------------------------------------------------|--------------|------------------|
| 1  | NFkB interacting protein 1                                             | R.IPMPPSSPQPRS*T*PRQRPIPLS*MIFK.L(+3)             | XP_001075705 | -0.56 $\pm$ 0.24 |
| 2  | hsp 90kDa alpha (cytosolic), class B member 1                          | K.IEDVGS*DEEDDSGKDK.K(+2)                         | NP_001004082 | -0.55 $\pm$ 0.35 |
| 3  | EPS8-like 2                                                            | R.QSILPPPQS*PAPIPFQRQPGDS*PQAK.N(+3)              | NP_001101978 | -0.55 $\pm$ 0.34 |
| 4  | scaffold attachment factor B                                           | R.APTAAPS*PEPR.D(+2)                              | NP_071789    | -0.53 $\pm$ 0.23 |
| 5  | PREDICTED: AHNAK nucleoprotein isoform 1 isoform 1                     | K.MEGPGVDIDS*PDVNIEGPEGK.L(+3)                    | XP_001078032 | -0.49 $\pm$ 0.17 |
| 6  | calnexin                                                               | K.AEEDILNRS*PR.N(+2)                              | NP_742005    | -0.48 $\pm$ 0.25 |
| 7  | PREDICTED: PDZ domain containing 10                                    | K.QSATT*LLVGPRHGISHVIDLK.T(+3)                    | XP_001053582 | -0.48 $\pm$ 0.7  |
| 8  | PREDICTED: PDZ-domain protein scribble                                 | R.MVEPENAVTITPLRPEDDY*SPR.E(+3)                   | XP_001074724 | -0.48 $\pm$ 0.41 |
| 9  | PREDICTED: serine/arginine repetitive matrix 2                         | K.AAEIPAVASCWVGPQVS*PEHK.E(+3)                    | XP_001056343 | -0.47 $\pm$ 0.17 |
| 10 | thyroid hormone receptor associated protein 3                          | R.ASVSDL*PR.E(+2)                                 | NP_001009693 | -0.45 $\pm$ 0.08 |
| 11 | oxidative-stress responsive 1                                          | R.LHKTEDGGWEWS*DDEFDEESEEGKAAISQLR.S(+4)          | NP_001101664 | -0.45 $\pm$ 1.59 |
| 12 | PREDICTED: tensin                                                      | R.HLGGSGSVVPGS*PSLDR.H(+2)                        | XP_237286    | -0.44 $\pm$ 0.05 |
| 13 | lethal giant larvae homolog 2                                          | R.S*QSDGAETKPGVMEHALLSDAWVLK.E(+3)                | NP_001121021 | -0.43 $\pm$ 0.64 |
| 14 | monocarboxylate transporter                                            | R.SIIQYLT*GVIT*GLGLALNFQPS*LIMLNRYFNK.R(+4)       | NP_110461    | -0.43 $\pm$ 0.73 |
| 15 | PREDICTED: Epithelial protein lost in neoplasm (mEPLIN)                | R.TSSVKS*PKPLS*PSLRK.G(+3)                        | XP_217039    | -0.43 $\pm$ 0.1  |
| 16 | LIM domain containing preferred translocation partner in lipoma        | R.RSS*LDAEIDSLTILADLECSPPYKPR.A(+3)               | NP_001013886 | -0.42 $\pm$ 1.05 |
| 17 | Ste-20 related kinase                                                  | K.TEDGDWEWS*DDEMDEKSEEGK.A(+3)                    | NP_062235    | -0.42 $\pm$ 0.65 |
| 18 | PREDICTED: GrpE protein homolog 2, mitochondrial precursor (Mt-GrpE#2) | R.S*LWAVQRLQRLLAGAVS*ES*R.G(+3)                   | XP_001058643 | -0.41 $\pm$ 0.92 |
| 19 | matrin 3                                                               | R.RDS*FDDRGPSLNPVLDYDHGSR.S(+3)                   | NP_062022    | -0.4 $\pm$ 0.3   |
| 20 | PREDICTED: CAP-binding protein complex interacting protein 1           | K.S*RPVALGRVQK.V(+2)                              | XP_001077962 | -0.4 $\pm$ 0.39  |
| 21 | PREDICTED: AHNAK nucleoprotein isoform 1 isoform 1                     | K.MYFPDVEFDIKS*PK.F(+3)                           | XP_001078032 | -0.4 $\pm$ 0.13  |
| 22 | actin-binding LIM protein 1                                            | R.TLS*PTPSAEGFQDGR.D(+2)                          | NP_001037859 | -0.39 $\pm$ 0.21 |
| 23 | ladinin                                                                | R.LPS*VEEAEVSKPSPASKDEGEFQAILR.T(+3)              | NP_001101412 | -0.39 $\pm$ 0.62 |
| 24 | tight junction protein 3                                               | R.AIAEPES*PGESR.Y(+2)                             | NP_001101543 | -0.39 $\pm$ 0.15 |
| 25 | PREDICTED: AHNAK nucleoprotein isoform 1 isoform 1                     | K.FKAEALPS*PK.L(+2)                               | XP_001078032 | -0.39 $\pm$ 0.12 |
| 26 | PREDICTED: AHNAK nucleoprotein isoform 1 isoform 1                     | K.MEGPGVDIDS*PDVNIEGPEGK.L(+2)                    | XP_001078032 | -0.39 $\pm$ 0.09 |
| 27 | PREDICTED: PDZ-domain protein scribble                                 | R.MVEPENAVTITPLRPEDDY*PR.E(+3)                    | XP_001074724 | -0.38 $\pm$ 0.53 |
| 28 | periplakin                                                             | R.S*IVVIDPDTGRELSPEEAHR.A(+3)                     | NP_001100446 | -0.37 $\pm$ 0.21 |
| 29 | protein C                                                              | K.TIVPICLPNSGLAQELSQAGQETVVT*GWGY*QS*D<br>K.V(+4) | NP_036935    | -0.37 $\pm$ 0.45 |
| 30 | endosulfine alpha isoform 2                                            | K.YFDS*GDYNMAK.A(+2)                              | NP_068614    | -0.37 $\pm$ 0.12 |
| 31 | septin 2                                                               | R.ILDEIEEHSIKIYHLPDAES*DEDEFKEQTR.L(+4)           | NP_476489    | -0.37 $\pm$ 0.74 |
| 32 | PREDICTED: neuron navigator 1                                          | K.GQLTNIVSPT*AAT*TPR.I(+3)                        | XP_001063421 | -0.37 $\pm$ 0.17 |
| 33 | PREDICTED: tensin                                                      | R.AINPTMAAPGS*PSLSHR.Q(+3)                        | XP_237286    | -0.37 $\pm$ 0.17 |
| 34 | calnexin                                                               | K.AEEDILNRS*PR.N(+3)                              | NP_742005    | -0.36 $\pm$ 0.17 |
| 35 | PREDICTED: tensin                                                      | R.TVGTNTPPS*PGFGR.R(+2)                           | XP_237286    | -0.36 $\pm$ 0.13 |
| 36 | heat shock protein 90kDa alpha (cytosolic), class B member 1           | K.IEDVGS*DEEDDSGKDK.K(+2)                         | NP_001004082 | -0.35 $\pm$ 0.31 |
| 37 | mitogen-activated protein kinase 6                                     | R.ES*ADVVDKLNLDLNSVSQLEM#KSLISK.S(+3)             | NP_113810    | -0.35 $\pm$ 0.15 |
| 38 | EPS8-like 2                                                            | K.HLSLSEPVQVPEDVAPPGS*SPHANR.G(+3)                | NP_001101978 | -0.34 $\pm$ 0.04 |
| 39 | EPS8-like 2                                                            | K.HLSLSEPVQVPEDVAPPGSS*PHANR.G(+3)                | NP_001101978 | -0.34 $\pm$ 0.04 |
| 40 | PREDICTED: Epithelial protein lost in neoplasm (mEPLIN)                | K.GENEETLGRPAQPPSAGETPHS*PGVEDAPIAK.V(+3)         | XP_217039    | -0.34 $\pm$ 0.23 |

|    |                                                                      |                                           |              |              |
|----|----------------------------------------------------------------------|-------------------------------------------|--------------|--------------|
| 41 | PREDICTED: Epithelial protein lost in neoplasm (mEPLIN)              | K.GWSEPEPEQSEEFGGTQVTQTES*PRPSR.E(+3)     | XP_217039    | -0.34 ± 0.38 |
| 42 | PREDICTED: tensin-like SH2 domain containing 1                       | R.WDS*YENMSADGEVLHTQGPVDGSLYAK.V(+3)      | XP_341257    | -0.34 ± 0.5  |
| 43 | BCL2-associated transcription factor 1                               | R.IDIS*PSALR.K(+2)                        | NP_001041317 | -0.33 ± 0.18 |
| 44 | mannose receptor, C type 1                                           | K.GSSKAAGVVIVVLLIVIGAGVAAY*FFY*KK.R(+3)   | NP_001099593 | -0.33 ± 0.36 |
| 45 | hypothetical protein LOC300783                                       | R.WLDES*DAEMELR.A(+2)                     | NP_001100301 | -0.33 ± 0.26 |
| 46 | fibronectin leucine rich transmembrane protein 1                     | R.NS*LAAPPLNLPASHLQK.L(+2)                | NP_001102630 | -0.32 ± 0.78 |
| 47 | heterogeneous nuclear ribonucleoprotein K                            | R.RDYDDMS*PR.R(+2)                        | NP_476482    | -0.32 ± 0.05 |
| 48 | PCTAIRE protein kinase 3                                             | R.RAS*LSDIGFGK.L(+2)                      | NP_001093976 | -0.31 ± 0.49 |
| 49 | actinin, alpha 1                                                     | K.NY*ITGDEL.R(+2)                         | NP_112267    | -0.31 ± 0.34 |
| 50 | PREDICTED: AHNAK nucleoprotein isoform 1 isoform 1                   | K.VPDVDIS*SPGVNVEAPDIHVK.A(+3)            | XP_001078032 | -0.31 ± 0.27 |
| 51 | PREDICTED: AHNAK nucleoprotein isoform 1 isoform 1                   | K.VPDVISS*PGVNVEAPDIHVK.A(+3)             | XP_001078032 | -0.31 ± 0.27 |
| 52 | PREDICTED: Ras-GTPase-activating protein binding protein 1           | K.SAS*PAPADVAPAQEDLR.T(+2)                | XP_340803    | -0.31 ± 0.07 |
| 53 | heat shock protein 90kDa alpha (cytosolic), class B member 1         | K.IEDVGS*DEEDDSGKDK.K(+3)                 | NP_001004082 | -0.3 ± 0.3   |
| 54 | microtubule-associated protein 4                                     | K.VGS*LDNVGHLPAAGTVK.T(+3)                | NP_001019449 | -0.3 ± 0.07  |
| 55 | PREDICTED: tensin                                                    | R.HLGGSGSVVPGS*PSLDR.H(+3)                | XP_237286    | -0.3 ± 0.08  |
| 56 | ADNP homeobox 2                                                      | K.ERHHVMPT*VHT*MLR.S(+2)                  | NP_001120845 | -0.29 ± 0.17 |
| 57 | calcium regulated heat stable protein 1                              | R.DRS*PS*PLRGNVPS*PLPTR.R(+3)             | NP_690003    | -0.29 ± 0.2  |
| 58 | calcium regulated heat stable protein 1                              | R.DRS*PS*PLRGNVPSPLPT*R.R(+3)             | NP_690003    | -0.29 ± 0.2  |
| 59 | PREDICTED: cyclin fold protein 1                                     | R.S*ASADNLILPR.W(+2)                      | XP_341546    | -0.29 ± 0.1  |
| 60 | aquaporin 4 isoform 1                                                | K.GSYMVEDNRS*QVETEDLILKPGVVHVIDR.G(+4)    | NP_036957    | -0.28 ± 0.4  |
| 61 | PREDICTED: ribosomal protein L27a                                    | K.LWTLVS*KQTLVSAKNK.T(+3)                 | XP_001055169 | -0.28 ± 0.2  |
| 62 | NEL-like 1                                                           | R.CVSDPCLAGNIAY*DIR.K(+2)                 | NP_112331    | -0.27 ± 0.15 |
| 63 | PREDICTED: serine/arginine repetitive matrix 2                       | K.ELSH*HSPPRDNFSFESLEFR.N(+3)             | XP_001056343 | -0.27 ± 0.24 |
| 64 | PREDICTED: serine/arginine repetitive matrix 2                       | K.ELSHS*PPRDNFSFESLEFR.N(+3)              | XP_001056343 | -0.27 ± 0.24 |
| 65 | PREDICTED: Epithelial protein lost in neoplasm (mEPLIN)              | K.GENEETLGRPAQPPSAGETPHS*PGVEDAPIAK.V(+4) | XP_217039    | -0.27 ± 0.16 |
| 66 | eukaryotic translation initiation factor 4B                          | K.SLENETLNKEEDCHS*PTSKPPKPDQPLK.V(+4)     | NP_001008325 | -0.26 ± 0.15 |
| 67 | eukaryotic translation initiation factor 4B                          | K.SLENETLNKEEDCHSPT*SKPPKPDQPLK.V(+4)     | NP_001008325 | -0.26 ± 0.15 |
| 68 | RNA binding motif protein 39                                         | K.DKS*PVREPIDNLTPEER.D(+3)                | NP_001013225 | -0.26 ± 0.2  |
| 69 | solute carrier family 9 (sodium/hydrogen exchanger), member 1        | R.IGS*DPLAYEPK.A(+2)                      | NP_036784    | -0.26 ± 0.19 |
| 70 | phosphatidylethanolamine binding protein                             | K.FKVES*FR.K(+2)                          | NP_058932    | -0.26 ± 0.34 |
| 71 | synaptosomal-associated protein 23                                   | K.ATWGDGGDSS*PSNVVSK.Q(+2)                | NP_073180    | -0.26 ± 0.17 |
| 72 | PREDICTED: putative pheromone receptor (Go-VN3)                      | K.HQRRY*LIVLT*GPPWLTS*YK.L(+3)            | XP_001060597 | -0.26 ± 0.39 |
| 73 | PREDICTED: tankyrase 1-binding protein of 182 kDa                    | K.ENYEDQEPLAQES*PITLATR.E(+3)             | XP_215763    | -0.26 ± 0.07 |
| 74 | PREDICTED: cyclin fold protein 1                                     | R.SAS*ADNLILPR.W(+2)                      | XP_341546    | -0.26 ± 0.12 |
| 75 | myeloid/lymphoid (trithorax homolog, Drosophila); translocated to, 4 | K.QGAIYHGLATLLNQPS*PMMQR.I(+3)            | NP_037349    | -0.25 ± 0.21 |
| 76 | heat shock protein 1                                                 | R.QLS*SGVSEIR.Q(+2)                       | NP_114176    | -0.25 ± 0.09 |
| 77 | PREDICTED: Syntaxin-binding protein 5-like (Tomosyn-2)               | R.GQRLGELEEKTAGMMT*SAEAFSK.H(+2)          | XP_001070379 | -0.25 ± 0.24 |
| 78 | PREDICTED: eIF-5B isoform 2                                          | K.SVPTIDS*GNEDDDSSF.K.I(+2)               | XP_001071547 | -0.25 ± 0.12 |
| 79 | PREDICTED: CAP-binding protein complex interacting protein 1         | K.S*RPVALGRVQK.V(+1)                      | XP_001077962 | -0.25 ± 0.74 |
| 80 | epsin 3                                                              | R.TPVLPSGPPITDPWAPSS*PTPK.L(+3)           | NP_001019962 | -0.24 ± 0.12 |
| 81 | epsin 3                                                              | R.TPVLPSGPPITDPWAPSSPT*PK.L(+3)           | NP_001019962 | -0.24 ± 0.12 |
| 82 | ladinin                                                              | R.LPS*VEEAESKSPSPASKDEGEFQAILR.T(+4)      | NP_001101412 | -0.24 ± 0.31 |
| 83 | calcium channel, voltage-dependent, alpha2/delta subunit 1 isoform 3 | R.RRPWY*IQGAASPKDM#LILVDVS*GSVSGTLK.L(+3) | NP_001104317 | -0.24 ± 0.32 |
| 84 | aquaporin 2 (collecting duct)                                        | R.RQS*VELHSPQS*LPR.G(+3)                  | NP_037041    | -0.24 ± 1.17 |
| 85 | hepatoma-derived growth factor                                       | R.AGDMLEDS*PKRPK.E(+2)                    | NP_446159    | -0.24 ± 0.19 |
| 86 | heterogeneous nuclear ribonucleoprotein K                            | R.DYDDMS*PR.R(+2)                         | NP_476482    | -0.24 ± 0.04 |

|     |                                                                                      |                                                |              |              |
|-----|--------------------------------------------------------------------------------------|------------------------------------------------|--------------|--------------|
| 87  | alpha-spectrin 2                                                                     | R.WRS*LQQLAEER.S(+2)                           | NP_741984    | -0.23 ± 0.13 |
| 88  | PREDICTED: Oxysterol-binding protein-related protein 3 (ORP-3)                       | R.LHS*SNPNLSTLDFGEEK.S(+3)                     | XP_342684    | -0.23 ± 0.13 |
| 89  | PREDICTED: Oxysterol-binding protein-related protein 3 (ORP-3)                       | R.LHSS*NPNLSTLDFGEEK.S(+3)                     | XP_342684    | -0.23 ± 0.13 |
| 90  | catenin (cadherin-associated protein), alpha 1, 102kDa                               | R.TPEELDDSD*DFETEDFDVR.S(+2)                   | NP_001007146 | -0.22 ± 0.12 |
| 91  | solute carrier family 9 (sodium/hydrogen exchanger), member 1                        | K.ITNYLTVPAHKLDS*PTMSR.A(+3)                   | NP_036784    | -0.22 ± 0.14 |
| 92  | solute carrier family 9 (sodium/hydrogen exchanger), member 1                        | K.ITNYLTVPAHKLDSPTMS*R.A(+3)                   | NP_036784    | -0.22 ± 0.14 |
| 93  | myosin, heavy chain 9, non-muscle                                                    | R.KGTGDCS*DEEVDGKADGADAK.A(+2)                 | NP_037326    | -0.22 ± 0.23 |
| 94  | adenosine monophosphate deaminase 3                                                  | K.GPPSVSPAMSP*T*PLVPGAASKPGLAPYDMPEY QR.A(+4)  | NP_113732    | -0.22 ± 0.18 |
| 95  | calnexin                                                                             | K.QKS*DAEEDGGTGS*QDEEDSKPK.A(+3)               | NP_742005    | -0.22 ± 0.48 |
| 96  | ADP-ribosylation factor guanine nucleotide-exchange factor 2 (brefeldin A-inhibited) | R.ELEKPIQSKPQS*PVIQATAGS*PK.F(+3)              | NP_851597    | -0.22 ± 0.08 |
| 97  | PREDICTED: CG5937-PA                                                                 | R.GPDS*PLLQRQHLIDQGMQR.H(+3)                   | XP_001072524 | -0.22 ± 0.19 |
| 98  | PREDICTED: tensin                                                                    | K.VSSS*PVANGMAS*PSGSSTVFSHTLPDFSK.Y(+3 )       | XP_237286    | -0.22 ± 0.25 |
| 99  | branched chain keto acid dehydrogenase E1, alpha polypeptide                         | R.IGHHS*TSDSSAYRS*VDEVNYWDKQDHPISR.L(+4)       | NP_036914    | -0.21 ± 0.13 |
| 100 | protein kinase, cAMP dependent regulatory, type II alpha                             | R.RVS*VCAETFNPEDEEDNDPR.V(+3)                  | NP_062137    | -0.21 ± 0.07 |
| 101 | drebrin-like                                                                         | K.LRS*PFLQK.Q(+2)                              | NP_112642    | -0.21 ± 0.06 |
| 102 | adenosine monophosphate deaminase 3                                                  | K.GPPSVS*PAMS*PTTPLVPGAASKPGLAPYDMPEY QR.A(+3) | NP_113732    | -0.21 ± 0.3  |
| 103 | hepatoma-derived growth factor                                                       | R.AGDM#LEDS*PKRPK.E(+3)                        | NP_446159    | -0.21 ± 0.13 |
| 104 | PREDICTED: (NUANCE protein)                                                          | R.LTSHTPLGLDDEKEAS*ENETDIEDPREIPADSWR.K(+4)    | XP_001080795 | -0.21 ± 0.12 |
| 105 | PREDICTED: splicing factor, arginine/serine-rich 1 (ASF/SF2)                         | R.VKVDGPRS*PSYGR.S(+3)                         | XP_001081187 | -0.21 ± 0.09 |
| 106 | PREDICTED: Epithelial protein lost in neoplasm (mEPLIN)                              | R.SEAQQPIYTKPLS*PDAR.T(+2)                     | XP_217039    | -0.21 ± 0.12 |
| 107 | epsin 3                                                                              | R.TPVLPSGPPITDPWAPS*SPTPK.L(+3)                | NP_001019962 | -0.2 ± 0.09  |
| 108 | p21-activated kinase 4                                                               | R.SNS*LRRES*PPPPAR.A(+3)                       | NP_001099708 | -0.2 ± 0.13  |
| 109 | vinculin                                                                             | K.GWLRDPNAS*PGDAGEQAIR.Q(+3)                   | NP_001100718 | -0.2 ± 0.07  |
| 110 | PREDICTED: NADH dehydrogenase (ubiquinone) 1 beta subcomplex, 4, 15kDa               | K.YKPAPLAALPSTLDSVEY*DVSPETRK.A(+3)            | XP_001056198 | -0.2 ± 0.75  |
| 111 | PREDICTED: (PDHE1-A type I) isoform 1                                                | R.Y*HGHS*SDPGVS*YR.T(+3)                       | XP_001060860 | -0.2 ± 0.25  |
| 112 | PREDICTED: (PDHE1-A type I) isoform 1                                                | R.YHGHS*M#SDPGVS*YR.T(+3)                      | XP_001060860 | -0.2 ± 0.25  |
| 113 | Cobl-like 1                                                                          | R.QSS*LNQSSDPEHIR.Q(+3)                        | NP_001101203 | -0.19 ± 0.06 |
| 114 | erythrocyte protein band 4.1-like 1 isoform L                                        | R.RLPSS*PAS*PSPK.G(+2)                         | NP_067713    | -0.19 ± 0.08 |
| 115 | plectin 1                                                                            | R.T*QLASWSDPTEETGPVAGILDTELEK.V(+3)            | NP_071796    | -0.19 ± 0.28 |
| 116 | plectin 1                                                                            | R.TQLAS*WSDPTEETGPVAGILDTELEK.V(+3)            | NP_071796    | -0.19 ± 0.28 |
| 117 | reticulon 4                                                                          | R.GPLPAAPPAAPERQPS*WER.S(+2)                   | NP_114019    | -0.19 ± 0.17 |
| 118 | solute carrier family 14 (urea transporter), member 2 isoform 2                      | K.LYESELSS*PTWSSSQDTHPALPLEMPEEK.D(+3 )        | NP_808877    | -0.19 ± 0.47 |
| 119 | proteasome subunit alpha type 3-like                                                 | K.ESLKEEDES*DDDNM#.-(+2)                       | NP_001004094 | -0.18 ± 0.13 |
| 120 | catenin (cadherin-associated protein), alpha 1, 102kDa                               | R.T*PEELDDSD*DFETEDFDVR.S(+3)                  | NP_001007146 | -0.18 ± 0.22 |
| 121 | catenin (cadherin-associated protein), alpha 1, 102kDa                               | R.TPEELDDSD*DFETEDFDVR.S(+3)                   | NP_001007146 | -0.18 ± 0.22 |
| 122 | ladinin                                                                              | K.GRPEETAQQKS*PVSEKTPVSAK.R(+4)                | NP_001101412 | -0.18 ± 0.14 |
| 123 | cingulin-like 1                                                                      | R.RQDS*AGPILDGAR.S(+2)                         | NP_001101634 | -0.18 ± 0.11 |
| 124 | galectin-related protein                                                             | K.LDDGHLNNSLGS*PVQADVFPRL.L(+3)                | NP_001128202 | -0.18 ± 0.21 |
| 125 | heterogeneous nuclear ribonucleoprotein A1                                           | K.SES*PKEPEQLR.K(+3)                           | NP_058944    | -0.18 ± 0.24 |
| 126 | PREDICTED: zinc finger CCCH-type containing 5                                        | K.LHS*LQS*QLRLDLEAVDGVIFQLRAK.Q(+3)            | XP_001059160 | -0.18 ± 0.25 |
| 127 | heat shock protein 90kDa alpha (cytosolic), class B member 1                         | K.IEDVGS*DEEDDSGKDKK.K(+3)                     | NP_001004082 | -0.17 ± 0.21 |
| 128 | RAS p21 protein activator (GTPase activating protein) 1                              | K.WPTNNTMRT*RVVS*GFVFLR.L(+3)                  | NP_037267    | -0.17 ± 0.1  |
| 129 | SH3-domain kinase binding protein 1                                                  | R.S*IEVENDFLPVEK.T(+2)                         | NP_445812    | -0.17 ± 0.04 |
| 130 | septin 2                                                                             | K.IYHLPDAES*DEDEDKQTR.L(+4)                    | NP_476489    | -0.17 ± 0.09 |
| 131 | PREDICTED: AHNK nucleoprotein isoform 2 isoform 1                                    | R.KGDRS*PEPGQTWAHEVFSSR.S(+3)                  | XP_001078152 | -0.17 ± 0.08 |

|     |                                                                                         |                                                    |              |              |
|-----|-----------------------------------------------------------------------------------------|----------------------------------------------------|--------------|--------------|
| 132 | heat shock 105kDa                                                                       | K.IES*PKLER.T(+2)                                  | NP_001011901 | -0.16 ± 0.07 |
| 133 | BCL2-associated transcription factor 1                                                  | R.RIDIS*PSALR.K(+2)                                | NP_001041317 | -0.16 ± 0.17 |
| 134 | family with sequence similarity 83, member H                                            | R.KGS*PTPAYPER.K(+2)                               | NP_001124037 | -0.16 ± 0.07 |
| 135 | erythrocyte protein band 4.1-like 1 isoform L                                           | R.RLPSSPAS*PSPK.G(+2)                              | NP_067713    | -0.16 ± 0.07 |
| 136 | programmed cell death 4                                                                 | R.DSGRGDS*VSDNGSEAVR.S(+3)                         | NP_071601    | -0.16 ± 0.09 |
| 137 | drebrin-like                                                                            | K.LRS*PFLQK.Q(+3)                                  | NP_112642    | -0.16 ± 0.13 |
| 138 | nucleobindin 1                                                                          | R.AQRLS*QETEALGR.S(+2)                             | NP_445915    | -0.16 ± 0.13 |
| 139 | PREDICTED: Beta-2-syntrophin isoform 2                                                  | R.LVHSGS*GCRSPSLGSDLTFATR.T(+3)                    | XP_001071043 | -0.16 ± 0.1  |
| 140 | PREDICTED: Beta-2-syntrophin isoform 2                                                  | R.LVHSGSGCRS*PSLGSDLTFATR.T(+3)                    | XP_001071043 | -0.16 ± 0.1  |
| 141 | PREDICTED: mitogen-activated protein kinase kinase kinase 10                            | R.S*DSDEAAPTAPSPPPS*LLPPSPS*T*NPLVDVELE SFKK.D(+4) | XP_001073032 | -0.16 ± 0.17 |
| 142 | PREDICTED: microsomal glutathione S-transferase 3                                       | R.AKM#AVLSKEY*GFVLLTGAASFVMVLHLAINVGK.A (+3)       | XP_001076104 | -0.16 ± 0.48 |
| 143 | PREDICTED: dynein heavy chain domain 3                                                  | R.YPPNAPFY*KIM#VPT*VDT*VR.Y(+3)                    | XP_220603    | -0.16 ± 0.37 |
| 144 | PCTAIRE protein kinase 3                                                                | R.NEDGRDEPGQLS*PGVQYQQR.Q(+3)                      | NP_001093976 | -0.15 ± 0.04 |
| 145 | catenin (cadherin associated protein), alpha 2                                          | R.SRT*SVQTEDDQLIAGQSAR.A(+3)                       | NP_001100068 | -0.15 ± 0.08 |
| 146 | catenin (cadherin associated protein), alpha 2                                          | R.SRTS*VQTEDDQLIAGQSAR.A(+3)                       | NP_001100068 | -0.15 ± 0.08 |
| 147 | catenin (cadherin associated protein), delta 1                                          | R.VGGS*SVDLHR.F(+3)                                | NP_001101210 | -0.15 ± 0.33 |
| 148 | branched chain keto acid dehydrogenase E1, alpha polypeptide                            | R.IGHHS*TSDDS*SAYRSVDEVNYWDKQDHPISR.L(+4)          | NP_036914    | -0.15 ± 0.13 |
| 149 | ankyrin 3, epithelial isoform 1                                                         | R.AEEPVS*PLTAYQK.S(+2)                             | NP_113993    | -0.15 ± 0.12 |
| 150 | DEAD (Asp-Glu-Ala-Asp) box polypeptide 1                                                | R.VGWSTM#QAS*LDLGTDKFGFGGTGKK.S(+3)                | NP_445866    | -0.15 ± 0.1  |
| 151 | PREDICTED: tankyrase 1-binding protein of 182 kDa                                       | R.KEIPAS*PDRLWGSR.L(+3)                            | XP_215763    | -0.15 ± 0.07 |
| 152 | PREDICTED: Dystroglycan precursor (Dystrophin-associated glycoprotein 1)                | R.IVPTPTSPAIAPPTET*MAPPVR.D(+2)                    | XP_343484    | -0.15 ± 0.25 |
| 153 | LIM domain 7                                                                            | R.EVSRS*PDQFSDMR.I(+3)                             | NP_001001515 | -0.14 ± 0.03 |
| 154 | serine/arginine repetitive matrix 1                                                     | R.KETES*EAEDDNLDDLER.H(+3)                         | NP_001101456 | -0.14 ± 0.07 |
| 155 | solute carrier family 14 (urea transporter), member 2 isoform 2                         | K.LYESELSS*PTWSSSQDTHPALPPEEK.D(+4)                | NP_808877    | -0.14 ± 0.9  |
| 156 | translocase of outer mitochondrial membrane 70 homolog A                                | R.AS*PALGSGPDGSGDSLEMSSLD.R.A(+2)                  | NP_997684    | -0.14 ± 0.13 |
| 157 | PREDICTED: Nucleophosmin                                                                | K.CGSGPVHISGQHLVAVEEDAES*EDEDEEDVKLLG MSGK.R(+4)   | XP_001071367 | -0.14 ± 0.31 |
| 158 | Rho guanine nucleotide exchange factor (GEF) 12                                         | R.VCLEDTPERTEGVQDADTQSLVGS*PSTR.G(+3)              | NP_001013264 | -0.13 ± 0.2  |
| 159 | nuclear cap binding protein subunit 1, 80kDa                                            | R.RKT*SDANETEDHLESICK.V(+4)                        | NP_001014785 | -0.13 ± 0.06 |
| 160 | epsin 3                                                                                 | R.TPVLPSPGPPITDPWAPSS*PTPK.L(+2)                   | NP_001019962 | -0.13 ± 0.17 |
| 161 | serine/arginine repetitive matrix 1                                                     | R.KET*ESEADNLDLDER.H(+3)                           | NP_001101456 | -0.13 ± 0.07 |
| 162 | family with sequence similarity 83, member H                                            | R.KGS*PTPAYPER.K(+3)                               | NP_001124037 | -0.13 ± 0.08 |
| 163 | thymopoietin                                                                            | K.GPPDFSSDEEREPT*PVLGSGASVGR.G(+3)                 | NP_037019    | -0.13 ± 0.09 |
| 164 | USO1 homolog, vesicle docking protein                                                   | K.LKDLGHPVEEEDS*GDQEDDDDELDDGDRDQDI. (+4)          | NP_062252    | -0.13 ± 0.08 |
| 165 | sorting nexin 16                                                                        | K.FT*VY*KILVKESPEESWVFR.R(+3)                      | NP_071625    | -0.13 ± 0.31 |
| 166 | PREDICTED: Transcription initiation factor TFIID 105 kDa subunit (TAFII-105) (TAFII105) | K.VTVAPVKSLTQIGTTVATTAS*SASS*GQTVLENVK. K(+3)      | XP_001073245 | -0.13 ± 0.32 |
| 167 | paxillin                                                                                | R.YAHQQPPS*PSPIYSSSTK.N(+3)                        | NP_001012147 | -0.12 ± 0.09 |
| 168 | Structure specific recognition protein 1                                                | K.EGINPGYDDYADS*DEDQHDAYLER.M(+3)                  | NP_112383    | -0.12 ± 0.08 |
| 169 | Structure specific recognition protein 1                                                | K.EGINPGYDDYADSDQHDAY*LER.M(+3)                    | NP_112383    | -0.12 ± 0.08 |
| 170 | calcium regulated heat stable protein 1                                                 | R.TFS*ATVR.A(+2)                                   | NP_690003    | -0.12 ± 0.2  |
| 171 | solute carrier family 14 (urea transporter), member 2 isoform 2                         | R.YKLYEELS*SPTWSSSQDTHPALPPEEK.D (+4)              | NP_808877    | -0.12 ± 0.35 |
| 172 | PREDICTED: AHNAK nucleoprotein isoform 1 isoform 1                                      | K.MYFPDVEFDIKS*PK.F(+2)                            | XP_001078032 | -0.12 ± 0.13 |
| 173 | transforming acidic coiled coil 2 isoform 2                                             | K.TPEKLDNTPAS*PPRS*PAEPSDPIAK.G(+3)                | NP_001004418 | -0.11 ± 0.14 |
| 174 | thyroid hormone receptor associated protein 3                                           | R.IDIS*PSTFR.K(+2)                                 | NP_001009693 | -0.11 ± 0.06 |
| 175 | serine/arginine repetitive matrix 1                                                     | K.KPPAPPSPVQS*QS*PSTNWS*PAAPAKK.A(+3)              | NP_001101456 | -0.11 ± 0.13 |
| 176 | lethal giant larvae homolog 2                                                           | R.VAVGCRLS*NGEAE.(-+2)                             | NP_001121021 | -0.11 ± 0.08 |
| 177 | acidic (leucine-rich) nuclear phosphoprotein 32 family, member A                        | R.NRTPS*DVKELVLDNCR.S(+3)                          | NP_037035    | -0.11 ± 0.15 |



|     |                                                                       |                                                 |              |              |
|-----|-----------------------------------------------------------------------|-------------------------------------------------|--------------|--------------|
| 224 | histone deacetylase 1                                                 | R.MLPHAPGVQMQAIPEDAIP EES*GDEDEEDPDKR.I(+4)     | NP_001020580 | -0.06 ± 0.11 |
| 225 | syntrophin, acidic 1                                                  | K.NSAGGTSVGVWDS*PPAS*PLQR.Q(+3)                 | NP_001094371 | -0.06 ± 0.12 |
| 226 | EF hand domain family, member B                                       | R.APLGKSHDQTPGLPKGMDVINTT*LGTPPT*IR.E(+3)       | NP_001100349 | -0.06 ± 0.3  |
| 227 | ladinin                                                               | R.SVERLPS*VEEA E VSKPS*PPASKDEGE EEFQAILR.T(+4) | NP_001101412 | -0.06 ± 0.17 |
| 228 | erythrocyte protein band 4.9                                          | K.ST*SPPPS*PEVWAESR.T(+2)                       | NP_001101855 | -0.06 ± 0.07 |
| 229 | PREDICTED: OTU domain containing 4 protein isoform 1                  | R.LQRPK EES*S*EDENEVSNILR.S(+3)                 | XP_001074219 | -0.06 ± 0.23 |
| 230 | PREDICTED: U2 (RNU2) small nuclear RNA auxiliary factor 2 isoform b   | R.GAKEEHGLIRS*PR.H(+3)                          | XP_218195    | -0.06 ± 0.13 |
| 231 | protein kinase, cAMP dependent regulatory, type II beta               | R.RAS*VCAEAYNPDEEEDDAESR.I(+3)                  | NP_001025191 | -0.05 ± 0.18 |
| 232 | non-SMC condensin II complex, subunit D3                              | R.T*Y*AAQS*LVQLLS*KLPSK.E(+3)                   | NP_001029172 | -0.05 ± 0.46 |
| 233 | utrophin                                                              | K.NVRPQPPT*SPEGR.T(+2)                          | NP_037202    | -0.05 ± 0.05 |
| 234 | utrophin                                                              | K.NVRPQPPTS*PEGR.T(+2)                          | NP_037202    | -0.05 ± 0.05 |
| 235 | protein kinase, cAMP dependent regulatory, type I, alpha              | R.TDSREDEIS*PPPPNPVVK.G(+3)                     | NP_037313    | -0.05 ± 0.13 |
| 236 | small glutamine-rich tetratricopeptide repeat (TPR)-containing, alpha | R.GPDRTPPSEEDSAEER.L(+3)                        | NP_073194    | -0.05 ± 0.12 |
| 237 | myosin, heavy chain 10, non-muscle                                    | R.QLHIEGASLELS*DDDTESK.T(+3)                    | NP_113708    | -0.05 ± 0.46 |
| 238 | chloride channel, nucleotide-sensitive, 1A                            | R.FGEESKEPFS*DEDEDND DVEPISEFR.F(+3)            | NP_113907    | -0.05 ± 0.44 |
| 239 | septin 2                                                              | K.IYHL PDAES*DEDED FKEQTR.L(+3)                 | NP_476489    | -0.05 ± 0.02 |
| 240 | PREDICTED: topoisomerase (DNA) II beta                                | K.KTSFDQDS*DVDIFPSDFTSEPPALPR.T(+3)             | XP_001067768 | -0.05 ± 0.24 |
| 241 | PREDICTED: Epithelial protein lost in neoplasm (mEPLIN)               | R.SEAQQPIYTKPLS*PDAR.T(+3)                      | XP_217039    | -0.05 ± 0.08 |
| 242 | proteasome subunit alpha type 3-like                                  | K.ESLKEEDES*DDDNM.-(+2)                         | NP_001004094 | -0.04 ± 0.04 |
| 243 | eukaryotic translation elongation factor 1 delta                      | K.GATPAEDEDNDIDLFGS*DEE EEDKEAAR.L(+3)          | NP_001013122 | -0.04 ± 0.11 |
| 244 | catenin (cadherin associated protein), delta 1                        | R.LRS*YEDMIGEEVPPDQYYWAPLAQHER.G(+3)            | NP_001101210 | -0.04 ± 0.29 |
| 245 | catenin (cadherin associated protein), delta 1                        | R.VGGS*SVDLHR.F(+2)                             | NP_001101210 | -0.04 ± 0.27 |
| 246 | golgi autoantigen, golgin subfamily a, 3                              | K.DKFMLQAKVS*ELK.N(+3)                          | NP_001101317 | -0.04 ± 0.41 |
| 247 | serine/arginine repetitive matrix 1                                   | R.RYS*PPIQR.R(+2)                               | NP_001101456 | -0.04 ± 0.05 |
| 248 | EPS8-like 2                                                           | K.YWGPAS*PTHK.L(+2)                             | NP_001101978 | -0.04 ± 0.29 |
| 249 | EPS8-like 2                                                           | K.YWGPASPT*HK.L(+2)                             | NP_001101978 | -0.04 ± 0.29 |
| 250 | phosphoglucomutase 1                                                  | K.AIGGIILTAS*HNPGGPNGDFGIK.F(+3)                | NP_058729    | -0.04 ± 0.16 |
| 251 | reticulon 4                                                           | R.GPLPAAPPAAPERQPS*WER.S(+3)                    | NP_114019    | -0.04 ± 0.05 |
| 252 | tripartite motif-containing 28                                        | R.SRS*GEGEV SGLMR.K(+2)                         | NP_446368    | -0.04 ± 0.06 |
| 253 | calnexin                                                              | K.QKS*DAEEDGGTGSQDEEDSKPK.A(+3)                 | NP_742005    | -0.04 ± 0.6  |
| 254 | progesterone receptor membrane component 2                            | R.LLKPG EEPS*EYTD EEDTKDHSKQD.-(+3)             | NP_001008375 | -0.03 ± 0.11 |
| 255 | phosphoglucomutase 1                                                  | K.AIGGIILT*ASHNPGPNGDFGIK.F(+3)                 | NP_058729    | -0.03 ± 0.15 |
| 256 | heat shock protein 1                                                  | R.SPS*WEPFR.D(+2)                               | NP_114176    | -0.03 ± 0.15 |
| 257 | NSFL1 (p97) cofactor (p47)                                            | R.KKS*PNELVDDLK.G(+3)                           | NP_114187    | -0.03 ± 0.06 |
| 258 | p21-activated kinase 2                                                | K.YLS*FTPPEKDGFPSTPALNTK.G(+3)                  | NP_445758    | -0.03 ± 0.21 |
| 259 | PREDICTED: tankyrase 1-binding protein of 182 kDa                     | K.SSGSL S*PGLETEDPLEAR.E(+2)                    | XP_215763    | -0.03 ± 0.05 |
| 260 | PREDICTED: tetracycline transporter-like protein                      | R.AS*S*VTLGFHT* AANLLS*PLALLR.F(+3)             | XP_223533    | -0.03 ± 0.24 |
| 261 | hypothetical protein LOC287534                                        | K.KKGDGV LDS*PDSGLPPS*PSPSHWGLAAATGGGGER.A(+4)  | NP_001007612 | -0.02 ± 0.15 |
| 262 | RNA binding motif protein 39                                          | R.YRS*PYSGPK.F(+2)                              | NP_001013225 | -0.02 ± 0.08 |
| 263 | WD repeat domain 42A                                                  | R.VHGHS*DEE EEEEEQPR.H(+3)                      | NP_001014253 | -0.02 ± 0.33 |
| 264 | nuclear cap binding protein subunit 1, 80kDa                          | R.KTS*DANETEDHLES LICK.V(+3)                    | NP_001014785 | -0.02 ± 0.16 |
| 265 | leucine rich repeat containing 47                                     | R.RES*GEGEE E VADSAR.L(+3)                      | NP_001129138 | -0.02 ± 0.16 |
| 266 | phosphatidylethanolamine binding protein                              | K.VLTPTQVMNRPS*SISWDGLDPGK.L(+3)                | NP_058932    | -0.02 ± 0.25 |
| 267 | heat shock protein 1                                                  | R.SPS*WEPFRDWYPAHSR.L(+4)                       | NP_114176    | -0.02 ± 0.25 |
| 268 | hepatoma-derived growth factor                                        | R.AGDMLEDS*PKRPK.E(+3)                          | NP_446159    | -0.02 ± 0.06 |
| 269 | kinesin 13B                                                           | R.LEVTS*DSEDA SEVPEWLR.E(+2)                    | NP_998791    | -0.02 ± 0.19 |
| 270 | PREDICTED: SAPS domain family, member 3                               | R.IQQFDDGGS*DEEDIWEEK.H(+2)                     | XP_001067905 | -0.02 ± 0.16 |

|     |                                                                 |                                                       |              |              |
|-----|-----------------------------------------------------------------|-------------------------------------------------------|--------------|--------------|
| 271 | PREDICTED: AHNAK nucleoprotein isoform 2 isoform 1              | R.KGDRS*PEPGQTWAHEVFSSR.S(+4)                         | XP_001078152 | -0.02 ± 0.08 |
| 272 | estrogen receptor binding site associated, antigen, 9           | R.KLS*GDQITLPTTVDYSSVPK.Q(+3)                         | NP_001009665 | -0.01 ± 0.07 |
| 273 | estrogen receptor binding site associated, antigen, 9           | R.KLSGDQIT*LPTTVDYSSVPK.Q(+3)                         | NP_001009665 | -0.01 ± 0.07 |
| 274 | eukaryotic translation elongation factor 1 delta                | K.KGATPAEDEDNDIDLFGS*DEEEEDKEAAR.L(+3)                | NP_001013122 | -0.01 ± 0.07 |
| 275 | elongation factor Tu GTP binding domain containing 1            | R.LM#AAMYTCDIMATSDVLGRVYAVLS*K.R(+3)                  | NP_001101004 | -0.01 ± 0.38 |
| 276 | kinase insert domain protein receptor                           | K.NKTVST*LVIAAYVS*ALYK.C(+3)                          | NP_037194    | -0.01 ± 0.07 |
| 277 | hepatoma-derived growth factor                                  | K.GNAEGS*S*DEEGKLVIDEPAKEK.N(+3)                      | NP_446159    | -0.01 ± 0.24 |
| 278 | mitogen-activated protein kinase 1                              | R.VADPDHDHTGFLTEY*VATR.W(+3)                          | NP_446294    | -0.01 ± 0.08 |
| 279 | heterogeneous nuclear ribonucleoprotein K                       | K.IIPTLEEGQLQPS*PTATSQLPLESDAVECLNYQHYK<br>.G(+4)     | NP_476482    | -0.01 ± 0.08 |
| 280 | dynein cytoplasmic 1 light intermediate chain 1                 | R.DFQEYVEPGEDFPAS*PQRR.A(+3)                          | NP_665715    | -0.01 ± 0.04 |
| 281 | solute carrier family 14 (urea transporter), member 2 isoform 2 | K.EMSDNRRS*PLLPEPLSSR.Y(+3)                           | NP_808877    | -0.01 ± 0.21 |
| 282 | kinesin 13B                                                     | R.LEVTSDS*EDASEVPEWLR.E(+2)                           | NP_998791    | -0.01 ± 0.2  |
| 283 | PREDICTED: nuclear mitotic apparatus protein 1                  | R.LGS*PDDSNALLSLPGYRPTTR.S(+3)                        | XP_218972    | -0.01 ± 0.12 |
| 284 | nucleobindin 1                                                  | K.SGKLS*QELDFVSHNVR.T(+3)                             | NP_445915    | 0 ± 0.09     |
| 285 | PREDICTED: ribosomal protein L27a                               | K.LWT*LVSKQTLVSAANK.T(+3)                             | XP_001055169 | 0 ± 0.75     |
| 286 | PREDICTED: (PDHE1-A type I) isoform 1                           | R.YMGTS*VER.A(+2)                                     | XP_001060860 | 0 ± 0.02     |
| 287 | tight junction protein 1                                        | K.FNHLLPSETVHKPELSS*KPPSPK.T(+4)                      | NP_001099736 | 0 ± 0.13     |
| 288 | tight junction protein 1                                        | K.FNHLLPSETVHKPELSSKPPPS*PK.T(+4)                     | NP_001099736 | 0 ± 0.13     |
| 289 | catenin (cadherin associated protein), delta 1                  | R.GSLAS*LDSLRLK.G(+2)                                 | NP_001101210 | 0 ± 0.25     |
| 290 | synapse associated protein 1                                    | K.SSSRDDNLPLTEAVRPKT*PPVVIK.S(+4)                     | NP_001004253 | 0.01 ± 0.27  |
| 291 | thyroid hormone receptor associated protein 3                   | K.HGLTHEELKS*PREPGYK.A(+4)                            | NP_001009693 | 0.01 ± 0.11  |
| 292 | paxillin                                                        | K.TGSSS*PPGGLSKPGSQLDMLGSLQSDLNK.L(+3)                | NP_001012147 | 0.01 ± 0.3   |
| 293 | eukaryotic translation elongation factor 1 delta                | K.KGATPAEDEDNDIDLFGS*DEEEEDKEAAR.L(+4)                | NP_001013122 | 0.01 ± 0.14  |
| 294 | high-mobility group nucleosome binding domain 1                 | K.QAEVADQQTDLPAENGETENQS*PAS*EEEKEAK.<br>S(+3)        | NP_001013202 | 0.01 ± 0.24  |
| 295 | ankyrin 3, epithelial isoform 2                                 | R.RQS*FTSLALR.K(+2)                                   | NP_001029156 | 0.01 ± 0.22  |
| 296 | oxysterol binding protein                                       | K.GDMS*DEDDENEFFDAPEIITMPENLGHK.R(+3)                 | NP_001102397 | 0.01 ± 0.29  |
| 297 | hypothetical protein LOC500552                                  | K.KLQLERPVS*PEAQADLQR.N(+3)                           | NP_001128101 | 0.01 ± 0.11  |
| 298 | leucine rich repeat containing 47                               | R.RES*GEGEEVADSAR.L(+2)                               | NP_001129138 | 0.01 ± 0.09  |
| 299 | heterogeneous nuclear ribonucleoprotein U                       | R.AKS*PQPPVEEEDHFDTTVCLDTYNCDLHFK.I(+<br>4)           | NP_476480    | 0.01 ± 0.1   |
| 300 | numb homolog                                                    | R.RTPS*EADRWLEEVSK.S(+3)                              | NP_579821    | 0.01 ± 0.07  |
| 301 | solute carrier family 14 (urea transporter), member 2 isoform 2 | K.EMS*DNNRSPLLPEPLSSR.Y(+3)                           | NP_808877    | 0.01 ± 0.22  |
| 302 | zinc finger, CCCH-type with G patch domain                      | R.ITDVDNGYY*TVK.F(+2)                                 | NP_001009656 | 0.02 ± 0.13  |
| 303 | BCL2-associated transcription factor 1                          | K.LKELFDYS*PPLHK.S(+3)                                | NP_001041317 | 0.02 ± 0.12  |
| 304 | cingulin-like 1                                                 | R.NCFPKCGS*QPNS*PTPEDLAK.T(+3)                        | NP_001101634 | 0.02 ± 0.08  |
| 305 | utrophin                                                        | K.NVRPQPPTS*PEGR.T(+3)                                | NP_037202    | 0.02 ± 0.03  |
| 306 | histone deacetylase 2                                           | R.MLPHAPGVQMQAIPEDAVHEDS*GDEDGEDPKR.<br>I(+4)         | NP_445899    | 0.02 ± 0.13  |
| 307 | PREDICTED: Beta-2-syntrophin isoform 2                          | R.GLGPPS*PPAPPRGPAGEASAS*PPVRR.V(+3)                  | XP_001071043 | 0.02 ± 0.14  |
| 308 | PREDICTED: Myocyte-specific enhancer factor 2B                  | R.NLRTQVPVLGNLAS*SS*RGSAVHPPHR.T(+3)                  | XP_574970    | 0.02 ± 0.65  |
| 309 | LIM domain 7                                                    | R.SAS*VNKEPICLTGIMR.R(+3)                             | NP_001001515 | 0.03 ± 0.02  |
| 310 | paxillin                                                        | K.T*GSSSPGGLSKPGSQLDMLGSLQSDLNK.L(+3)                 | NP_001012147 | 0.03 ± 0.31  |
| 311 | spectrin, beta, non-erythrocytic 1                              | K.VSEEAEQQWDTSKGDQVSNGLPAEQGS*PR.M<br>(+3)            | NP_001013148 | 0.03 ± 0.28  |
| 312 | B-cell linker                                                   | R.FTEGGS*PAADGPVPSFPFNSTFADQEAELHGK<br>WYAGACDR.K(+4) | NP_001020938 | 0.03 ± 0.14  |
| 313 | eukaryotic translation initiation factor 3, subunit 9 (eta)     | R.AKPAAQSEETAAS*PAAS*PTPQSAQEPSAPGK.A<br>(+3)         | NP_001026810 | 0.03 ± 0.24  |
| 314 | myosin, heavy chain 9, non-muscle                               | K.GTGDCS*DEEVDGKADGADAK.A(+3)                         | NP_037326    | 0.03 ± 0.06  |

|     |                                                                                                |                                                    |              |             |
|-----|------------------------------------------------------------------------------------------------|----------------------------------------------------|--------------|-------------|
| 315 | carnitine palmitoyltransferase 1B                                                              | R.SPIM#VDSNY*Y*AMDFVLKNTSQQAAAR.L(+3)              | NP_037332    | 0.03 ± 0.12 |
| 316 | adducin 1 (alpha)                                                                              | K.SPDDQSAVPNT*PPS*TPVKLEGLPQEPTSR.D(+3 )           | NP_058686    | 0.03 ± 0.09 |
| 317 | adducin 1 (alpha)                                                                              | K.SPDDQSAVPNT*PPST*PVKLEGLPQEPTSR.D(+3 )           | NP_058686    | 0.03 ± 0.09 |
| 318 | matrin 3                                                                                       | R.RDS*FDDRGPNSLNPVLDYDHGSR.S(+4)                   | NP_062022    | 0.03 ± 0.09 |
| 319 | PREDICTED: DNA2 DNA replication helicase 2-like                                                | K.DY*TLIVGM#PGT*GKTTT*ICALVR.I(+3)                 | XP_001080557 | 0.03 ± 0.12 |
| 320 | phosphoprotein enriched in astrocytes 15A                                                      | K.YKDIIRQPS*EEEIK.L(+3)                            | NP_001013249 | 0.04 ± 0.14 |
| 321 | chromobox homolog 5 (HP1 alpha homolog, Drosophila)                                            | R.KSS*FSNSADDIK.S(+2)                              | NP_001100267 | 0.04 ± 0.09 |
| 322 | serine/arginine repetitive matrix 1                                                            | R.RLS*PS*ASPPR.R(+2)                               | NP_001101456 | 0.04 ± 0.07 |
| 323 | DNA segment, Chr 4, ERATO Doi 22, expressed isoform 1                                          | R.ILGSAS*PEEEQEKPILDRPTR.I(+3)                     | NP_001108071 | 0.04 ± 0.11 |
| 324 | myeloid/lymphoid or mixed-lineage leukemia (trithorax homolog, Drosophila); translocated to, 4 | K.ITSVS*GNLCTEEQT*PPPRPEAYPIPTQTYTR.E(+3)          | NP_037349    | 0.04 ± 0.25 |
| 325 | PREDICTED: pleckstrin homology domain containing, family A member 6                            | R.YIDLEPVAPLS*PEELKEK.Q(+3)                        | XP_001060716 | 0.04 ± 0.16 |
| 326 | PREDICTED: PDHE1-A type I isoform 1                                                            | R.YHGHS*MSDPGVS*YR.T(+3)                           | XP_001060860 | 0.04 ± 0.14 |
| 327 | tight junction protein 1                                                                       | K.VQIPVSHPDPPVVS*DNEDDSY*DEDVHDPR.S(+3)            | NP_001099736 | 0.05 ± 0.06 |
| 328 | serine/arginine repetitive matrix 1                                                            | R.RRS*PS*PAPPPPPPPPR.R(+3)                         | NP_001101456 | 0.05 ± 0.09 |
| 329 | calnexin                                                                                       | K.QKSDAEEDGGTGS*QDEEDSKPKAEDEILNR.S(+4)            | NP_742005    | 0.05 ± 0.15 |
| 330 | PREDICTED: TBC1 domain family member 4 (Akt substrate of 160 kDa) (AS160) isoform 1            | R.HAS*APSHVQPSDSEK.N(+3)                           | XP_001074155 | 0.05 ± 0.09 |
| 331 | PREDICTED: splicing factor, arginine/serine-rich 1 (ASF/SF2)                                   | R.VKVDGPRS*PS*YGR.S(+3)                            | XP_001081187 | 0.05 ± 0.11 |
| 332 | PREDICTED: tankyrase 1-binding protein of 182 kDa                                              | R.NMAPGAGCS*PGEPR.E(+2)                            | XP_215763    | 0.05 ± 0.17 |
| 333 | PRP4 pre-mRNA processing factor 4 homolog B                                                    | K.LCDFGSASHVADNDITPY*LVSR.F(+3)                    | NP_001011923 | 0.06 ± 0.08 |
| 334 | cingulin-like 1                                                                                | R.S*RSVDSAFPFLQGNTEYLTEFSR.N(+3)                   | NP_001101634 | 0.06 ± 0.38 |
| 335 | plectin 1                                                                                      | R.SSS*VGSSSSYPISAVPR.T(+2)                         | NP_071796    | 0.06 ± 0.11 |
| 336 | calpastatin isoform a                                                                          | K.LLEKNEAITGPLPDS*PKPMGIDHAIDALSSDFTCSS*PTGK.Q(+4) | NP_445747    | 0.06 ± 0.27 |
| 337 | hepatoma-derived growth factor-related protein 2                                               | R.KRS*EGLSLDR.K(+3)                                | NP_598232    | 0.06 ± 0.1  |
| 338 | kinesin 13B                                                                                    | R.RRS*SGLQPQGAPEAR.R(+3)                           | NP_998791    | 0.06 ± 0.52 |
| 339 | PREDICTED: hypothetical protein                                                                | R.RDT*ATEIQDVGVPR.N(+3)                            | XP_001077427 | 0.06 ± 0.07 |
| 340 | PREDICTED: tensin                                                                              | R.QGSPT*PALPEKR.R(+3)                              | XP_237286    | 0.06 ± 0.12 |
| 341 | BCL2-associated transcription factor 1                                                         | K.KAEGEPQEEES*PLKSK.S(+3)                          | NP_001041317 | 0.07 ± 0.08 |
| 342 | tight junction protein 1                                                                       | K.VQIPVSHPDPPVVS*DNEDDS*YDEDVHDPR.S(+4)            | NP_001099736 | 0.07 ± 0.1  |
| 343 | NCK adaptor protein 1                                                                          | K.RKPS*VPDTASPADDSEVDPGER.L(+3)                    | NP_001100321 | 0.07 ± 0.09 |
| 344 | hypothetical protein LOC308341                                                                 | K.NAKRPT*TQPPGIPIT*KRPR.V(+3)                      | NP_001128017 | 0.07 ± 0.15 |
| 345 | myeloid/lymphoid or mixed-lineage leukemia (trithorax homolog, Drosophila); translocated to, 4 | K.ITSVST*GNLCTEEQT*PPPRPEAYPIPTQTYTR.E(+3)         | NP_037349    | 0.07 ± 0.24 |
| 346 | plectin 1                                                                                      | R.SS*SVGSSSSYPISAVPR.T(+2)                         | NP_071796    | 0.07 ± 0.11 |
| 347 | heat shock protein 1                                                                           | R.SPS*WEPFRDWYPAHSR.L(+3)                          | NP_114176    | 0.07 ± 0.13 |
| 348 | PREDICTED: vacuolar protein sorting 13B isoform 1                                              | K.CT*CT*IFM#AEFNLLRLLPVIMGGK.N(+3)                 | XP_001058951 | 0.07 ± 0.37 |
| 349 | ladinin                                                                                        | R.SVERLPS*VEEAESKPSPPASKDEGEFQAILR.T(+4)           | NP_001101412 | 0.08 ± 0.21 |
| 350 | protein phosphatase 1, regulatory subunit 2                                                    | K.IDEPTPYHNMIGDDEDVCS*DSEGNEVMTPEILAK.K(+3)        | NP_620178    | 0.08 ± 0.09 |
| 351 | PREDICTED: hypothetical protein isoform 2                                                      | K.LGGNEALS*PTS*PSKESRPGEWR.T(+3)                   | XP_001065403 | 0.08 ± 0.16 |
| 352 | PREDICTED: Septin-4 (Peanut-like protein 2) (Brain protein H5)                                 | K.IYQFPDCDS*DEDEDFKLQDQALK.E(+3)                   | XP_001081164 | 0.08 ± 0.11 |
| 353 | spectrin, beta, non-erythrocytic 1                                                             | R.T*SSKES*PVPS*PTSDRK.A(+3)                        | NP_001013148 | 0.09 ± 0.15 |
| 354 | spectrin, beta, non-erythrocytic 1                                                             | R.TSS*KES*SPVPS*PTSDRK.A(+3)                       | NP_001013148 | 0.09 ± 0.15 |
| 355 | spectrin, beta, non-erythrocytic 1                                                             | R.TSS*KES*PVPS*PTSDRK.A(+3)                        | NP_001013148 | 0.09 ± 0.15 |
| 356 | catenin (cadherin associated protein), delta 1                                                 | R.GSLAS*LDS*LRR.G(+2)                              | NP_001101210 | 0.09 ± 0.28 |
| 357 | PREDICTED: hypothetical protein isoform 2                                                      | K.LGGNEALSPT*S*PSKESRPGEWR.T(+3)                   | XP_001065403 | 0.09 ± 0.16 |
| 358 | PREDICTED: Semaphorin-4B precursor (Semaphorin C) (Sema C)                                     | R.VRLGS*EIRDSVV.-(+2)                              | XP_001065984 | 0.09 ± 0.23 |



|     |                                                                             |                                                     |              |             |
|-----|-----------------------------------------------------------------------------|-----------------------------------------------------|--------------|-------------|
| 359 | progesterone receptor membrane component 2                                  | R.LLKPGEEPSEYT*DEEDTKDHSKQD.-(+4)                   | NP_001008375 | 0.1 ± 0.11  |
| 360 | protein phosphatase 1, regulatory (inhibitor) subunit 12B                   | R.RLS*GTSDIEEKENR.E(+3)                             | NP_001100648 | 0.1 ± 0.09  |
| 361 | pinin, desmosome associated protein                                         | R.RGFS*DSGGGPPAK.Q(+2)                              | NP_001102493 | 0.1 ± 0.16  |
| 362 | ATP-binding cassette, sub-family F (GCN20), member 1                        | K.GAEQGS*EEEKEEKEGEVK.A(+3)                         | NP_001103353 | 0.1 ± 0.14  |
| 363 | phosphatidylethanolamine binding protein                                    | K.VLTPTQVMNRPSS*ISWDGLDPGK.L(+3)                    | NP_058932    | 0.1 ± 0.18  |
| 364 | signal transducer and activator of transcription 1 isoform alpha            | R.LQSTENLLPMS*PEEFDEMSK.I(+2)                       | NP_116001    | 0.1 ± 0.24  |
| 365 | zyxin                                                                       | R.S*PGGPGPLTK.E(+2)                                 | NP_446213    | 0.1 ± 0.43  |
| 366 | protein phosphatase 1, regulatory (inhibitor) subunit 12A                   | R.RLGS*TSDIEEKENR.E(+3)                             | NP_446342    | 0.1 ± 0.09  |
| 367 | phosphoribosyl pyrophosphate synthetase-associated protein 2                | R.LGIAVIHGEAQDAESDLVDGRHS*PPMVR.S(+4)               | NP_476472    | 0.1 ± 0.07  |
| 368 | PREDICTED: Secretory carrier-associated membrane protein 3                  | R.EPPPAY*EPPAPAPAPLPPPS*APS*VQSS*RK.L(+3 )          | XP_342280    | 0.1 ± 0.19  |
| 369 | solute carrier family 14 (urea transporter), member 2 isoform 2             | K.LYESELS*SPTWPSSSQDTHPALPLEMPEEK.D(+3 )            | NP_808877    | 0.11 ± 0.24 |
| 370 | BTB (POZ) domain containing 7                                               | R.EILS*SLLPFVRIEHILPMNS*EVLSDAM#KR.G(+3)            | NP_001102190 | 0.11 ± 0.33 |
| 371 | BTB (POZ) domain containing 7                                               | R.EILSS*LLPFVRIEHILPMNS*EVLSDAM#KR.G(+3)            | NP_001102190 | 0.11 ± 0.33 |
| 372 | myosin, heavy chain 9, non-muscle                                           | R.KGTGDCS*DEEVDGKADGADAK.A(+3)                      | NP_037326    | 0.11 ± 0.07 |
| 373 | heterogeneous nuclear ribonucleoprotein A1                                  | K.SES*PKEPEQLR.K(+2)                                | NP_058944    | 0.11 ± 0.32 |
| 374 | heterogeneous nuclear ribonucleoprotein D isoform a                         | K.IDASKNEEDEGHSNS*PR.H(+3)                          | NP_077380    | 0.11 ± 0.23 |
| 375 | PREDICTED: PDHE1-A type I isoform 1                                         | R.YHGHS*M#SDPGVSYR.T(+3)                            | XP_001060860 | 0.11 ± 0.17 |
| 376 | related RAS viral (r-ras) oncogene homolog 2                                | R.KFQEQECPPS*PEPTRK.E(+3)                           | NP_001013452 | 0.12 ± 0.06 |
| 377 | BCL2-associated transcription factor 1                                      | K.GRTDGDWDDQEVLDYFS*DKESAK.Q(+3)                    | NP_001041317 | 0.12 ± 0.13 |
| 378 | eukaryotic translation elongation factor 1 beta 2                           | K.YGPVSVADTTGSGAADAADDDIDLFGS*DDEEES<br>EDAKR.L(+4) | NP_001102269 | 0.12 ± 0.17 |
| 379 | hypothetical protein LOC500552                                              | K.ASSLAASESPGNALPTGAPETEPRS*PQS*PASK.A(+3)          | NP_001128101 | 0.12 ± 0.13 |
| 380 | mitogen activated protein kinase 3                                          | R.IADPEHDHTGFLT*EYVATR.W(+3)                        | NP_059043    | 0.12 ± 0.06 |
| 381 | mitogen activated protein kinase 3                                          | R.IADPEHDHTGFLTEY*VATR.W(+3)                        | NP_059043    | 0.12 ± 0.06 |
| 382 | cortactin isoform B                                                         | R.AKKQT*PPAS*PSPQPAEDRPPSS*PIYEDAAPLK.A(+4)         | NP_068640    | 0.12 ± 0.17 |
| 383 | cortactin isoform B                                                         | R.AKKQT*PPAS*PSPQPAEDRPPSSPIY*EDAAPLK.A(+4)         | NP_068640    | 0.12 ± 0.17 |
| 384 | cysteine string protein                                                     | R.S*LSTSGESLYHVLGLDK.N(+2)                          | NP_077075    | 0.12 ± 0.2  |
| 385 | heterogeneous nuclear ribonucleoprotein D isoform a                         | K.IDASKNEEDEGHSNS*SPR.H(+3)                         | NP_077380    | 0.12 ± 0.23 |
| 386 | spectrin, beta, non-erythrocytic 1                                          | R.TSS*KESSVPVS*PTSDRK.A(+3)                         | NP_001013148 | 0.13 ± 0.22 |
| 387 | histone deacetylase 1                                                       | R.MLPHAPGVQMQAIPEDAIPES*GDEDEEDPDKR.I(+3)           | NP_001020580 | 0.13 ± 0.14 |
| 388 | coiled-coil domain containing 43                                            | K.AALLAQYADVT*DEEDEADEKADPGASTANIGSDK.S(+3)         | NP_001094198 | 0.13 ± 0.15 |
| 389 | tight junction protein 1                                                    | K.KVQIPVSHPPDPVS*DNEDDS*YDEDVHDPR.S(+4 )            | NP_001099736 | 0.13 ± 0.11 |
| 390 | tight junction protein 1                                                    | K.KVQIPVSHPPDPVS*DNEDDSY*DEDVHDPR.S(+4 )            | NP_001099736 | 0.13 ± 0.11 |
| 391 | Cdc42-binding protein kinase beta                                           | K.HSTPSNSSNPSGPPS*PNS*PHR.S(+3)                     | NP_446072    | 0.13 ± 0.33 |
| 392 | heterogeneous nuclear ribonucleoprotein K                                   | K.IIPTLEEGQLPFS*PTATSQLPLESDAVECLNYQHYK.G(+3)       | NP_476482    | 0.13 ± 0.11 |
| 393 | PREDICTED: FCH domain only 2                                                | K.LSGINEIPRPF*PPITS*NTSPPPTAPLAR.A(+3)              | XP_219503    | 0.13 ± 0.13 |
| 394 | PREDICTED: Apoptotic chromatin condensation inducer in the nucleus (Acinus) | K.SSSFSEEKGES*DDEKPR.K(+3)                          | XP_240178    | 0.13 ± 0.08 |
| 395 | RNA binding motif protein 17                                                | R.RPDPS*DEDEDYERER.R(+3)                            | NP_001013076 | 0.14 ± 0.14 |
| 396 | chordin-like 2                                                              | R.HFAQIMGGT*TIKILK.E(+2)                            | NP_001101007 | 0.14 ± 0.66 |
| 397 | receptor (chemosensory) transporter protein 4                               | R.SPSPSPSPSPKSHS*SSPS*R.S(+3)                       | NP_001101791 | 0.14 ± 0.25 |
| 398 | aquaporin 2 (collecting duct)                                               | R.RQS*VELHSPQLPR.G(+3)                              | NP_037041    | 0.14 ± 0.35 |
| 399 | PREDICTED: caspase recruitment domain family, member 14                     | R.LQGATLDDTDT*DLEFEMLDGADLS*QT*EDSLQGS.SR.S(+4)     | XP_001081765 | 0.14 ± 0.12 |
| 400 | PREDICTED: FCH domain only 2                                                | K.LSGINEIPRPF*PPITSNTS*PPPTAPLAR.A(+3)              | XP_219503    | 0.14 ± 0.13 |
| 401 | nucleosome assembly protein 1-like 4                                        | R.EFITGDVEPTDAESAWHS*ENEEDDKLAGDMK.N(+3)            | NP_001012170 | 0.15 ± 0.16 |

|     |                                                                                                      |                                                      |              |             |
|-----|------------------------------------------------------------------------------------------------------|------------------------------------------------------|--------------|-------------|
| 402 | aquaporin 4 isoform 1                                                                                | K.GSYMEVEDNRS*QVETEDLILKPGVVHVIDIDRGDE<br>K.K(+4)    | NP_036957    | 0.15 ± 0.12 |
| 403 | PREDICTED: serine/arginine repetitive matrix 2                                                       | R.S*RTPPSAPSQSR.M(+3)                                | XP_001056343 | 0.15 ± 0.19 |
| 404 | actin-binding LIM protein 1                                                                          | K.LRPT*RTSSESIYSRPGSSIPGS*PGHTIYAK.V(+4)             | NP_001037859 | 0.16 ± 0.17 |
| 405 | death-associated protein                                                                             | K.DKDDQEWESTS*PPKPTVYISGVIA.R.G(+3)                  | NP_071971    | 0.16 ± 0.15 |
| 406 | calpastatin isoform a                                                                                | K.NEAITGPLPDS*PKPMGIDHAIDALSSDFTCSS*PTG<br>K.Q(+4)   | NP_445747    | 0.16 ± 0.43 |
| 407 | PREDICTED: PDHE1-A type I isoform 1                                                                  | R.YHGHSMS*DPGVSYR.T(+3)                              | XP_001060860 | 0.16 ± 0.08 |
| 408 | PREDICTED: AHNAK nucleoprotein isoform 1 isoform 1                                                   | R.NRS*NS*FSDEREFSA PST*PTGTLEFAGGEGK.G(+<br>3)       | XP_001078032 | 0.16 ± 0.33 |
| 409 | PREDICTED: Epithelial protein lost in neoplasm (mEPLIN)                                              | K.DLWASKGENEETLGRPAQPPSAGETPHS*PGVED<br>APIAK.V(+4)  | XP_217039    | 0.16 ± 0.3  |
| 410 | hypothetical protein LOC296179                                                                       | K.NSKEPVIEDILNLESSSTSSGS*PVS*PGLYSK.T(+3)            | NP_001099985 | 0.18 ± 0.47 |
| 411 | hypothetical protein LOC300783                                                                       | K.RPLFLAPDFDRWLDES*DAEMELR.A(+4)                     | NP_001100301 | 0.18 ± 0.36 |
| 412 | hypothetical protein LOC500552                                                                       | R.LKASSLAASESPGNALPTGAPETEP RS*PQS*PASK<br>.A(+3)    | NP_001128101 | 0.18 ± 0.32 |
| 413 | cortactin isoform B                                                                                  | K.KQT*PPAS*PSPQPAEDRPPSS*PIYEDAAPLK.A(+4<br>)        | NP_068640    | 0.18 ± 0.3  |
| 414 | heterogeneous nuclear ribonucleoprotein D isoform a                                                  | K.IDASKNEEDEGHSNS*S*PR.H(+3)                         | NP_077380    | 0.18 ± 0.43 |
| 415 | PREDICTED: THUMP domain containing 1                                                                 | K.FIDKQQPS*GS*EGEDDDAEALKK.E(+3)                     | XP_001079074 | 0.18 ± 0.19 |
| 416 | SWI/SNF related, matrix associated, actin dependent<br>regulator of chromatin, subfamily c, member 1 | R.KHS*PS*PPPPTATESR.K(+3)                            | NP_001100331 | 0.19 ± 0.13 |
| 417 | heat shock protein 1                                                                                 | R.SPS*WEPFRDWYPAHSR.L(+2)                            | NP_114176    | 0.19 ± 1.35 |
| 418 | PREDICTED: serine/arginine repetitive matrix 2                                                       | R.RQPS*PQPS*PRDQQSSER.V(+3)                          | XP_001056343 | 0.19 ± 0.27 |
| 419 | Rho GTPase activating protein 1                                                                      | K.SSS*PEPVTHLKWDDPYDIAR.H(+3)                        | NP_001101217 | 0.2 ± 0.46  |
| 420 | peroxisome biogenesis factor 1                                                                       | K.EQGR*VFVLSPELLQK.I(+2)                             | NP_001102690 | 0.2 ± 0.59  |
| 421 | PC4 and SFRS1 interacting protein 1                                                                  | K.NLAKPGVT*S*TSDEEDDDQEGEKK.R(+3)                    | NP_786941    | 0.22 ± 0.27 |
| 422 | PC4 and SFRS1 interacting protein 1                                                                  | K.NLAKPGVTS*T*SDSEEDDDQEGEKK.R(+3)                   | NP_786941    | 0.22 ± 0.27 |
| 423 | serine/arginine repetitive matrix 1                                                                  | R.RYS*PS*PPPK.R(+2)                                  | NP_001101456 | 0.23 ± 0.15 |
| 424 | eukaryotic translation elongation factor 1 beta 2                                                    | K.YGPVSVADTTGSGAADAKDDDDIDLFGS*DDEEES<br>EDAKR.L(+3) | NP_001102269 | 0.23 ± 0.26 |
| 425 | cysteine string protein                                                                              | R.SLS*TSGESLYHVLGLDK.N(+2)                           | NP_077075    | 0.23 ± 0.16 |
| 426 | coiled-coil domain containing 105                                                                    | K.FNQEM#Y*VTRGLIK.G(+3)                              | NP_001020945 | 0.24 ± 0.26 |
| 427 | FERM, RhoGEF (Arhgef) and pleckstrin domain protein 1<br>(chondrocyte-derived)                       | R.LGAPENSGIST*LER.G(+2)                              | NP_001100757 | 0.24 ± 0.22 |
| 428 | myosin light chain, regulatory B                                                                     | R.ATS*NVFAMFDQSQIQEFKEAFNMIDQNR.D(+3)                | NP_059039    | 0.24 ± 0.44 |
| 429 | phosphatidylinositol 4-kinase type 2 alpha                                                           | R.VAAAGS*GSPPPCS*PGHDRER.Q(+3)                       | NP_446187    | 0.24 ± 0.16 |
| 430 | phosphatidylinositol 4-kinase type 2 alpha                                                           | R.VAAAGSGPS*PPCS*PGHDRER.Q(+3)                       | NP_446187    | 0.24 ± 0.16 |
| 431 | myosin phosphatase-Rho interacting protein isoform 1                                                 | R.MDIDRS*PGLLGTPLDK.T(+3)                            | NP_446266    | 0.24 ± 0.12 |
| 432 | estrogen receptor binding site associated, antigen, 9                                                | R.KLS*GDQITLPTVDYSSVPK.Q(+2)                         | NP_001009665 | 0.25 ± 0.2  |
| 433 | olfactory receptor Olr611                                                                            | R.LIS*S*K.L(+1)                                      | NP_001000926 | 0.26 ± 0.35 |
| 434 | catenin (cadherin associated protein), delta 1                                                       | R.FHPEPYGLEDDQRS*MGYDDL DYGMMSDYGTAR.<br>R(+4)       | NP_001101210 | 0.26 ± 0.15 |
| 435 | myosin light chain, regulatory B                                                                     | R.AT*SNVFAMFDQSQIQEFK.E(+3)                          | NP_059039    | 0.26 ± 0.34 |
| 436 | myosin light chain, regulatory B                                                                     | R.ATS*NVFAMFDQSQIQEFK.E(+3)                          | NP_059039    | 0.26 ± 0.34 |
| 437 | myosin light chain, regulatory B                                                                     | R.AT*SNVFAMFDQSQIQEFK.E(+2)                          | NP_059039    | 0.27 ± 0.25 |
| 438 | myosin light chain, regulatory B                                                                     | R.ATS*NVFAMFDQSQIQEFK.E(+2)                          | NP_059039    | 0.27 ± 0.25 |
| 439 | hypothetical protein LOC296179                                                                       | K.NSKEPVIEDILNLESSSTSSGSPVS*PGLYSK.T(+3)             | NP_001099985 | 0.28 ± 0.16 |
| 440 | chromobox homolog 5 (HP1 alpha homolog, Drosophila)                                                  | R.KSSFS*NSADDIKSK.K(+3)                              | NP_001100267 | 0.28 ± 0.73 |
| 441 | high mobility group AT-hook 1                                                                        | K.KLEKEEEEEGISQES*S*EEEQ.-(+3)                       | NP_647543    | 0.28 ± 0.33 |
| 442 | PREDICTED: tankyrase 1-binding protein of 182 kDa                                                    | R.ASRVPS*S*DEEVVEEPQSR.R(+3)                         | XP_215763    | 0.28 ± 0.33 |
| 443 | cortactin isoform B                                                                                  | K.KQT*PPAS*PSPQPAEDRPPS*SPIYEDAAPLK.A(+3<br>)        | NP_068640    | 0.29 ± 0.27 |
| 444 | nuclear casein kinase and cyclin-dependent kinase substrate<br>1                                     | K.VVDYSQFQES*DDADEDYGRDSGPPAKK.I(+3)                 | NP_073636    | 0.29 ± 0.37 |
| 445 | nuclear casein kinase and cyclin-dependent kinase substrate<br>1                                     | R.KVVDYSQFQES*DDADEDYGRDSGPPAK.K(+3)                 | NP_073636    | 0.29 ± 0.37 |

|     |                                                                               |                                                 |              |             |
|-----|-------------------------------------------------------------------------------|-------------------------------------------------|--------------|-------------|
| 446 | Structure specific recognition protein 1                                      | R.GLKEGINPGYDDYADS*DEDQHDAYLER.M(+4)            | NP_112383    | 0.29 ± 0.86 |
| 447 | solute carrier family 14 (urea transporter), member 2 isoform 2               | R.YKLYESELSS*PTWSSSQDTHPALP LLEMPEEKD LR.S(+4)  | NP_808877    | 0.29 ± 0.67 |
| 448 | PREDICTED: AHNAK nucleoprotein isoform 1 isoform 1                            | K.GDV DV SIPNVEGLDQGPS*LDIKSPK.L(+3)            | XP_001078032 | 0.29 ± 0.42 |
| 449 | PREDICTED: SH2 domain binding protein 1 (tetratricopeptide repeat containing) | R.RRPPKGEEGS*DDDETENGP KP.K(+4)                 | XP_238127    | 0.29 ± 0.14 |
| 450 | PREDICTED: E3 ubiquitin-protein ligase NEDD4-like protein (Nedd4-2) (NEDD4.2) | R.S*LSSPTVTL SAPLEGA K.D(+2)                    | XP_574161    | 0.3 ± 0.09  |
| 451 | PREDICTED: E3 ubiquitin-protein ligase NEDD4-like protein (Nedd4-2) (NEDD4.2) | R.SLS*SPTVTL SAPLEGA K.D(+2)                    | XP_574161    | 0.3 ± 0.09  |
| 452 | hypothetical protein LOC300783                                                | K.RPLFLAPDFDRWLDES*DAEMELR.A(+3)                | NP_001100301 | 0.31 ± 0.21 |
| 453 | aquaporin 1                                                                   | K.VWTSGQVVEEYDL DADDINS*R VEMKPK.-(+4)          | NP_036910    | 0.31 ± 0.38 |
| 454 | PREDICTED: AHNAK nucleoprotein isoform 1 isoform 1                            | R.SNS*FSDEREF SAPSTPTGTLEFAGGEGK.G(+3)          | XP_001078032 | 0.31 ± 0.11 |
| 455 | PREDICTED: AHNAK nucleoprotein isoform 1 isoform 1                            | R.SNSFS*DEREF SAPSTPTGTLEFAGGEGK.G(+3)          | XP_001078032 | 0.31 ± 0.11 |
| 456 | catenin (cadherin associated protein), delta 1                                | R.FHPEPYGLEDDQRSMGY*DDL DYGMMSDYGTAR. R(+4)     | NP_001101210 | 0.32 ± 0.14 |
| 457 | PREDICTED: AHNAK nucleoprotein isoform 1 isoform 1                            | R.S*NSFSDEREF SAPSTPTGTLEFAGGEGK.G(+3)          | XP_001078032 | 0.32 ± 0.11 |
| 458 | PREDICTED: pleckstrin homology domain containing, family G, member 3          | R.RPS*DRS*PTSVEKR.M(+3)                         | XP_001080822 | 0.32 ± 0.27 |
| 459 | PCTAIRE protein kinase 3                                                      | R.RLS*LSVPRPETIEESLTFEQFNQLHTQR.N(+4)           | NP_001093976 | 0.33 ± 0.33 |
| 460 | hippocalcin                                                                   | K.QNS*KLRPEM#LQDLR.E(+2)                        | NP_058818    | 0.33 ± 0.15 |
| 461 | dyskeratosis congenita 1, dyskerin                                            | R.KRDS*DS*DAEATPTTTPR.V(+3)                     | NP_596910    | 0.33 ± 0.24 |
| 462 | PREDICTED: heterogeneous nuclear ribonucleoprotein U isoform a                | R.S*KSPPPPEEEAKDEEEDQTLVNL DTYTSDLHFQIS K.D(+4) | XP_001073417 | 0.34 ± 0.26 |
| 463 | complement receptor related protein isoform 1                                 | K.EDSCVQPQSLT SQENNSTSSPARNSLT*QEV.-(+3)        | NP_001005330 | 0.35 ± 0.17 |
| 464 | PREDICTED: nuclear mitotic apparatus protein 1                                | R.AAQLQGS*PAPEKGEVLGDALQLD TLKQEA A.K.L(+3)     | XP_218972    | 0.35 ± 0.23 |
| 465 | myosin, heavy chain 9, non-muscle                                             | R.KGT*GDCS*DEEVDGKADGADAK.A(+3)                 | NP_037326    | 0.37 ± 0.12 |
| 466 | MYST histone acetyltransferase (monocytic leukemia) 3                         | K.QS*TVS*K.G(+1)                                | NP_001094040 | 0.38 ± 0.43 |
| 467 | splicing factor, arginine/serine-rich 10                                      | R.RRS*PS*PYYSR.G(+3)                            | NP_476460    | 0.38 ± 0.25 |
| 468 | phosphofructokinase, liver                                                    | R.RTLS*IDKGF.-(+2)                              | NP_037322    | 0.39 ± 0.18 |
| 469 | phosphofructokinase, liver                                                    | R.TLS*IDKGF.-(+2)                               | NP_037322    | 0.39 ± 0.09 |
| 470 | solute carrier family 14 (urea transporter), member 2 isoform 2               | K.LYESELSSPT*WSSSQDTHPALP LLEMPEEKDLR. S(+4)    | NP_808877    | 0.39 ± 0.25 |
| 471 | aquaporin 1                                                                   | K.VWTSGQVVEEYDL DADDINS*R VEMKPK.-(+3)          | NP_036910    | 0.4 ± 0.31  |
| 472 | tight junction protein 2                                                      | R.LYQDTRGS*YGS*DPEEEEEYRQLAAH SK.R(+4)          | NP_446225    | 0.4 ± 0.16  |
| 473 | ATP-binding cassette, sub-family C (CFTR/MRP), member 4                       | K.SGVDFGSL LKKEEEAEP S*PVPGT*PTLR.N(+3)         | NP_596902    | 0.4 ± 0.88  |
| 474 | PREDICTED: topoisomerase (DNA) II beta                                        | K.KT*SFQDQS*DVIDFSPDFTSEPPALPR.T(+3)            | XP_001067768 | 0.4 ± 0.17  |
| 475 | PREDICTED: heterogeneous nuclear ribonucleoprotein U isoform a                | R.SKS*PPPEEEAKDEEEDQTLVNL DTYTSDLHFQIS K.D(+4)  | XP_001073417 | 0.4 ± 0.28  |
| 476 | PCTAIRE protein kinase 3                                                      | K.RLS*LPMDIR.L(+2)                              | NP_001093976 | 0.41 ± 0.14 |
| 477 | oxysterol binding protein                                                     | K.MLAES*DES*GDEESVSQTDKTELQNTLR.T(+3)           | NP_001102397 | 0.44 ± 0.36 |
| 478 | aquaporin 2 (collecting duct)                                                 | R.RQSVELHS*PQS*LPR.G(+4)                        | NP_037041    | 0.44 ± 0.18 |
| 479 | nuclear casein kinase and cyclin-dependent kinase substrate 1                 | K.NSQEDS*EDS*EEKDVK.T(+2)                       | NP_073636    | 0.44 ± 0.45 |
| 480 | nuclear casein kinase and cyclin-dependent kinase substrate 1                 | K.NSQEDS*EDS*EEKDVK.T(+3)                       | NP_073636    | 0.5 ± 0.52  |
| 481 | catenin (cadherin associated protein), delta 1                                | R.FHPEPYGLEDDQRS*MGYDDL DYGMMSDYGTAR. R(+3)     | NP_001101210 | 0.52 ± 0.16 |
| 482 | aquaporin 2 (collecting duct)                                                 | R.RQS*VELHS*PQSLPR.G(+3)                        | NP_037041    | 0.55 ± 0.06 |
| 483 | mitogen activated protein kinase 1                                            | R.VADPDHDTGFLT*EY*VATR.W(+3)                    | NP_446294    | 0.58 ± 0.07 |

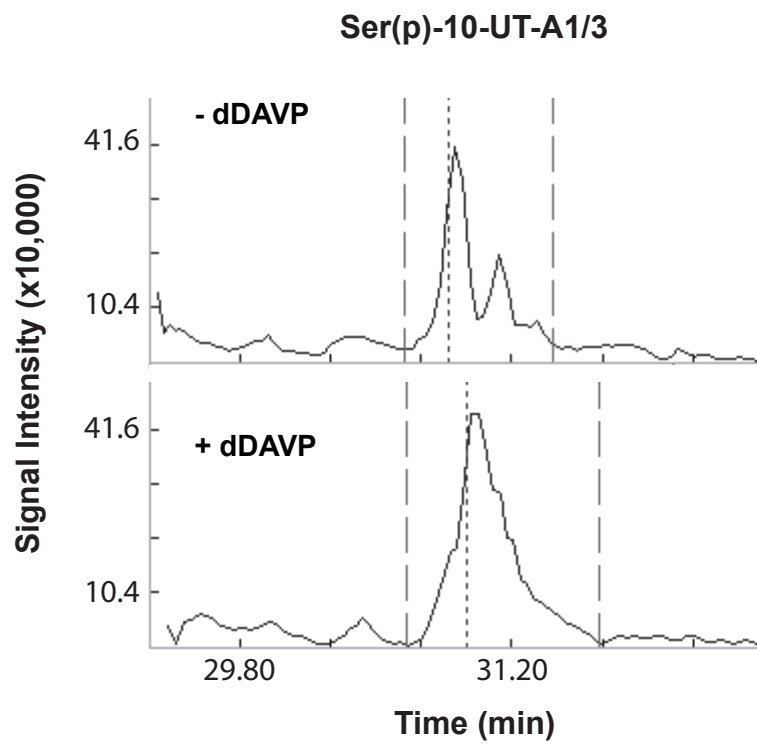

**Supplementary Figure 1:** Reconstructed ion chromatograms for a UT-A1/3 phosphopeptide with the Ser-10 residue phosphorylated. There is no change in abundance in the presence of dDAVP.

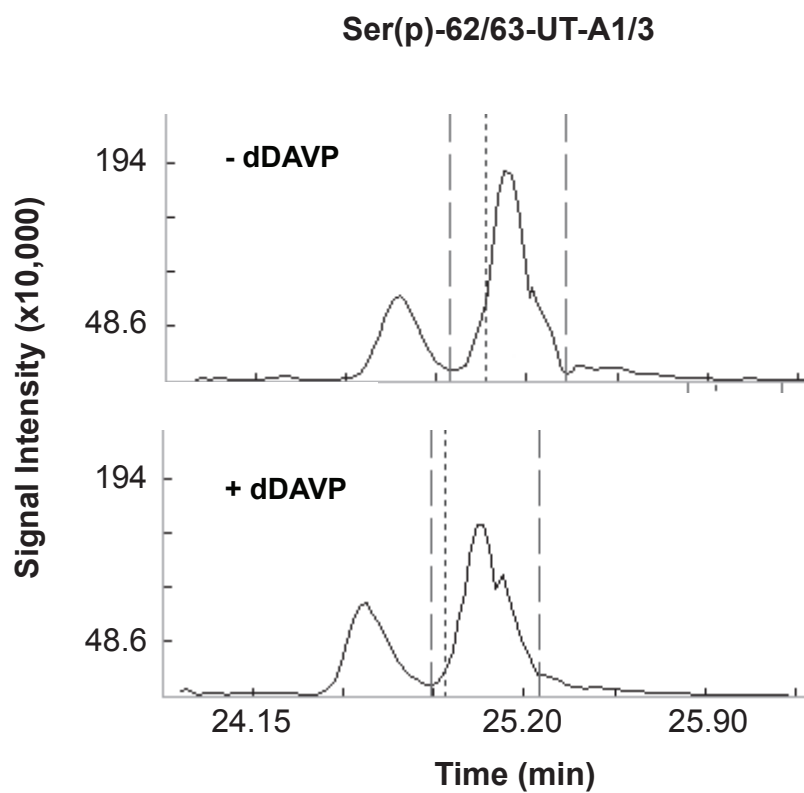

**Supplementary Figure 2:** Reconstructed ion chromatograms for a UT-A1/3 phosphopeptide with *both* Ser-62 *and* Ser-63 phosphorylated. There is no change in abundance in the presence of dDAVP.
