# Supplementary material
Source: PubMed Central journal article supplement (PMC2834543)
Supplement: ASN.2009070728_2.pdf [file ASN.2009070728_2.pdf]

## GO terms of phosphoproteins decreased by dDAVP

| <u>Input</u> | <u>Gene Symbol</u> | <u>GO category</u> | <u>GO Term</u>                       |
|--------------|--------------------|--------------------|--------------------------------------|
| NP_001019962 | Epn3               | component          | cell cortex                          |
| NP_001019962 | Epn3               | component          | clathrin-coated vesicle              |
| NP_001019962 | Epn3               | component          | cytoplasm                            |
| NP_001019962 | Epn3               | component          | cytoplasmic vesicle                  |
| NP_001019962 | Epn3               | component          | nucleus                              |
| NP_001019962 | Epn3               | component          | perinuclear region of cytoplasm      |
| NP_001019962 | Epn3               | function           | lipid binding                        |
| NP_001019962 | Epn3               | process            | not classified                       |
| NP_001101454 | Pdik1l             | component          | not classified                       |
| NP_001101454 | Pdik1l             | function           | not classified                       |
| NP_001101454 | Pdik1l             | process            | not classified                       |
| NP_001124461 | Ptges3             | component          | cellular_component                   |
| NP_001124461 | Ptges3             | component          | cytoplasm                            |
| NP_001124461 | Ptges3             | function           | isomerase activity                   |
| NP_001124461 | Ptges3             | function           | prostaglandin-E synthase activity    |
| NP_001124461 | Ptges3             | function           | unfolded protein binding             |
| NP_001124461 | Ptges3             | process            | fatty acid biosynthetic process      |
| NP_001124461 | Ptges3             | process            | prostaglandin biosynthetic process   |
| NP_001129068 | Agfg1              | component          | cytoplasmic membrane-bounded vesicle |
| NP_001129068 | Agfg1              | component          | nucleus                              |
| NP_001129068 | Agfg1              | function           | ARF GTPase activator activity        |
| NP_001129068 | Agfg1              | function           | DNA binding                          |
| NP_001129068 | Agfg1              | function           | metal ion binding                    |
| NP_001129068 | Agfg1              | function           | zinc ion binding                     |
| NP_001129068 | Agfg1              | process            | cell differentiation                 |
| NP_001129068 | Agfg1              | process            | multicellular organismal development |
| NP_001129068 | Agfg1              | process            | regulation of ARF GTPase activity    |
| NP_001129068 | Agfg1              | process            | spermatogenesis                      |
| NP_001129068 | Agfg1              | process            | transport                            |
| NP_037041    | Aqp2               | component          | apical plasma membrane               |
| NP_037041    | Aqp2               | component          | apical plasma membrane               |
| NP_037041    | Aqp2               | component          | apical plasma membrane               |
| NP_037041    | Aqp2               | component          | basolateral plasma membrane          |
| NP_037041    | Aqp2               | component          | cell fraction                        |
| NP_037041    | Aqp2               | component          | clathrin-coated vesicle              |
| NP_037041    | Aqp2               | component          | cytoplasm                            |
| NP_037041    | Aqp2               | component          | early endosome                       |
| NP_037041    | Aqp2               | component          | exocytic vesicle                     |
| NP_037041    | Aqp2               | component          | integral to membrane                 |
| NP_037041    | Aqp2               | component          | lysosome                             |
| NP_037041    | Aqp2               | component          | membrane fraction                    |
| NP_037041    | Aqp2               | component          | membrane fraction                    |
| NP_037041    | Aqp2               | component          | plasma membrane                      |
| NP_037041    | Aqp2               | component          | plasma membrane                      |
| NP_037041    | Aqp2               | component          | protein complex                      |
| NP_037041    | Aqp2               | component          | recycling endosome                   |
| NP_037041    | Aqp2               | component          | recycling endosome                   |
| NP_037041    | Aqp2               | component          | rough endoplasmic reticulum          |
| NP_037041    | Aqp2               | component          | trans-Golgi network                  |
| NP_037041    | Aqp2               | function           | actin binding                        |
| NP_037041    | Aqp2               | function           | protein binding                      |
| NP_037041    | Aqp2               | function           | transporter activity                 |
| NP_037041    | Aqp2               | function           | water channel activity               |
| NP_037041    | Aqp2               | function           | water channel activity               |
| NP_037041    | Aqp2               | function           | water channel activity               |
| NP_037041    | Aqp2               | process            | actin filament depolymerization      |
| NP_037041    | Aqp2               | process            | aging                                |
| NP_037041    | Aqp2               | process            | apoptosis                            |
| NP_037041    | Aqp2               | process            | cell volume homeostasis              |

|           |      |           |                                                 |
|-----------|------|-----------|-------------------------------------------------|
| NP_037041 | Aqp2 | process   | cellular response to water deprivation          |
| NP_037041 | Aqp2 | process   | cellular response to water deprivation          |
| NP_037041 | Aqp2 | process   | female pregnancy                                |
| NP_037041 | Aqp2 | process   | hyperosmotic response                           |
| NP_037041 | Aqp2 | process   | positive regulation of calcium ion transport    |
| NP_037041 | Aqp2 | process   | renal water transport                           |
| NP_037041 | Aqp2 | process   | renal water transport                           |
| NP_037041 | Aqp2 | process   | response to calcium ion                         |
| NP_037041 | Aqp2 | process   | response to glucagon stimulus                   |
| NP_037041 | Aqp2 | process   | response to hormone stimulus                    |
| NP_037041 | Aqp2 | process   | response to lipopolysaccharide                  |
| NP_037041 | Aqp2 | process   | response to lithium ion                         |
| NP_037041 | Aqp2 | process   | response to salt stress                         |
| NP_037041 | Aqp2 | process   | response to starvation                          |
| NP_037041 | Aqp2 | process   | response to water deprivation                   |
| NP_037041 | Aqp2 | process   | transport                                       |
| NP_037041 | Aqp2 | process   | water homeostasis                               |
| NP_037041 | Aqp2 | process   | water transport                                 |
| NP_037041 | Aqp2 | process   | water transport                                 |
| NP_037041 | Aqp2 | process   | water transport                                 |
| NP_110484 | Lyn  | component | Golgi apparatus                                 |
| NP_110484 | Lyn  | component | alpha2-beta1 integrin complex                   |
| NP_110484 | Lyn  | component | cell-cell adherens junction                     |
| NP_110484 | Lyn  | component | cytoplasm                                       |
| NP_110484 | Lyn  | component | cytosol                                         |
| NP_110484 | Lyn  | component | membrane fraction                               |
| NP_110484 | Lyn  | component | membrane raft                                   |
| NP_110484 | Lyn  | component | membrane raft                                   |
| NP_110484 | Lyn  | component | mitochondrial crista                            |
| NP_110484 | Lyn  | component | mitochondrial intermembrane space               |
| NP_110484 | Lyn  | component | mitochondrial membrane                          |
| NP_110484 | Lyn  | component | nucleus                                         |
| NP_110484 | Lyn  | component | perinuclear region of cytoplasm                 |
| NP_110484 | Lyn  | component | plasma membrane                                 |
| NP_110484 | Lyn  | component | plasma membrane                                 |
| NP_110484 | Lyn  | component | postsynaptic density                            |
| NP_110484 | Lyn  | function  | SH3 domain binding                              |
| NP_110484 | Lyn  | function  | enzyme binding                                  |
| NP_110484 | Lyn  | function  | gamma-tubulin binding                           |
| NP_110484 | Lyn  | function  | glycosphingolipid binding                       |
| NP_110484 | Lyn  | function  | integrin binding                                |
| NP_110484 | Lyn  | function  | kinase activity                                 |
| NP_110484 | Lyn  | function  | phosphoprotein binding                          |
| NP_110484 | Lyn  | function  | platelet-derived growth factor receptor binding |
| NP_110484 | Lyn  | function  | protein binding                                 |
| NP_110484 | Lyn  | function  | protein binding                                 |
| NP_110484 | Lyn  | function  | protein complex binding                         |
| NP_110484 | Lyn  | function  | protein complex binding                         |
| NP_110484 | Lyn  | function  | protein kinase activity                         |
| NP_110484 | Lyn  | function  | protein tyrosine kinase activity                |
| NP_110484 | Lyn  | function  | protein tyrosine kinase activity                |
| NP_110484 | Lyn  | function  | protein tyrosine kinase activity                |
| NP_110484 | Lyn  | function  | receptor binding                                |
| NP_110484 | Lyn  | function  | ubiquitin protein ligase binding                |
| NP_110484 | Lyn  | process   | B cell receptor signaling pathway               |
| NP_110484 | Lyn  | process   | B cell receptor signaling pathway               |
| NP_110484 | Lyn  | process   | cellular response to extracellular stimulus     |
| NP_110484 | Lyn  | process   | cellular response to heat                       |
| NP_110484 | Lyn  | process   | cytokine secretion                              |
| NP_110484 | Lyn  | process   | erythrocyte differentiation                     |

|           |      |           |                                                                           |
|-----------|------|-----------|---------------------------------------------------------------------------|
| NP_110484 | Lyn  | process   | histamine secretion by mast cell                                          |
| NP_110484 | Lyn  | process   | intracellular signaling cascade                                           |
| NP_110484 | Lyn  | process   | intracellular signaling cascade                                           |
| NP_110484 | Lyn  | process   | oligodendrocyte development                                               |
| NP_110484 | Lyn  | process   | peptidyl-tyrosine phosphorylation                                         |
| NP_110484 | Lyn  | process   | peptidyl-tyrosine phosphorylation                                         |
| NP_110484 | Lyn  | process   | positive regulation of Fc receptor mediated stimulatory signaling pathway |
| NP_110484 | Lyn  | process   | positive regulation of cell proliferation                                 |
| NP_110484 | Lyn  | process   | positive regulation of glial cell proliferation                           |
| NP_110484 | Lyn  | process   | positive regulation of oligodendrocyte progenitor proliferation           |
| NP_110484 | Lyn  | process   | positive regulation of phosphorylation                                    |
| NP_110484 | Lyn  | process   | positive regulation of tyrosine phosphorylation of STAT protein           |
| NP_110484 | Lyn  | process   | protein amino acid autophosphorylation                                    |
| NP_110484 | Lyn  | process   | regulation of release of sequestered calcium ion into cytosol             |
| NP_110484 | Lyn  | process   | response to amino acid stimulus                                           |
| NP_110484 | Lyn  | process   | response to axon injury                                                   |
| NP_110484 | Lyn  | process   | response to carbohydrate stimulus                                         |
| NP_110484 | Lyn  | process   | response to drug                                                          |
| NP_110484 | Lyn  | process   | response to hormone stimulus                                              |
| NP_110484 | Lyn  | process   | response to insulin stimulus                                              |
| NP_110484 | Lyn  | process   | response to organic cyclic substance                                      |
| NP_110484 | Lyn  | process   | response to peptide hormone stimulus                                      |
| NP_110484 | Lyn  | process   | response to protein stimulus                                              |
| NP_110484 | Lyn  | process   | response to sterol depletion                                              |
| NP_110484 | Lyn  | process   | response to toxin                                                         |
| NP_445747 | Cast | component | not classified                                                            |
| NP_445747 | Cast | function  | protein binding                                                           |
| NP_445747 | Cast | process   | myoblast fusion                                                           |
| NP_445747 | Cast | process   | negative regulation of catalytic activity                                 |
| NP_445747 | Cast | process   | regulation of protein catabolic process                                   |
| NP_446225 | Tjp2 | component | cytoplasm                                                                 |
| NP_446225 | Tjp2 | component | gap junction                                                              |
| NP_446225 | Tjp2 | component | plasma membrane                                                           |
| NP_446225 | Tjp2 | component | plasma membrane                                                           |
| NP_446225 | Tjp2 | component | tight junction                                                            |
| NP_446225 | Tjp2 | component | tight junction                                                            |
| NP_446225 | Tjp2 | function  | protein C-terminus binding                                                |
| NP_446225 | Tjp2 | function  | protein binding                                                           |
| NP_446225 | Tjp2 | process   | response to organic substance                                             |
| NP_742005 | Canx | component | axon                                                                      |
| NP_742005 | Canx | component | cell soma                                                                 |
| NP_742005 | Canx | component | cytoplasm                                                                 |
| NP_742005 | Canx | component | dendrite cytoplasm                                                        |
| NP_742005 | Canx | component | dendritic spine                                                           |
| NP_742005 | Canx | component | endoplasmic reticulum                                                     |
| NP_742005 | Canx | component | endoplasmic reticulum                                                     |
| NP_742005 | Canx | component | endoplasmic reticulum                                                     |
| NP_742005 | Canx | component | integral to membrane                                                      |
| NP_742005 | Canx | component | integral to membrane                                                      |
| NP_742005 | Canx | component | melanosome                                                                |
| NP_742005 | Canx | component | membrane                                                                  |
| NP_742005 | Canx | component | ribosome                                                                  |
| NP_742005 | Canx | component | rough endoplasmic reticulum                                               |
| NP_742005 | Canx | function  | calcium ion binding                                                       |
| NP_742005 | Canx | function  | protein binding                                                           |
| NP_742005 | Canx | function  | protein binding                                                           |
| NP_742005 | Canx | function  | protein binding                                                           |
| NP_742005 | Canx | function  | sugar binding                                                             |
| NP_742005 | Canx | function  | unfolded protein binding                                                  |
| NP_742005 | Canx | process   | aging                                                                     |

|           |          |           |                                                           |
|-----------|----------|-----------|-----------------------------------------------------------|
| NP_742005 | Canx     | process   | protein folding                                           |
| NP_786937 | Hsp90aa1 | component | cytoplasm                                                 |
| NP_786937 | Hsp90aa1 | component | cytoplasm                                                 |
| NP_786937 | Hsp90aa1 | component | cytosol                                                   |
| NP_786937 | Hsp90aa1 | component | intracellular                                             |
| NP_786937 | Hsp90aa1 | component | intracellular                                             |
| NP_786937 | Hsp90aa1 | function  | ATP binding                                               |
| NP_786937 | Hsp90aa1 | function  | ATP binding                                               |
| NP_786937 | Hsp90aa1 | function  | TPR domain binding                                        |
| NP_786937 | Hsp90aa1 | function  | nitric-oxide synthase regulator activity                  |
| NP_786937 | Hsp90aa1 | function  | nitric-oxide synthase regulator activity                  |
| NP_786937 | Hsp90aa1 | function  | protein binding                                           |
| NP_786937 | Hsp90aa1 | function  | protein binding                                           |
| NP_786937 | Hsp90aa1 | function  | protein homodimerization activity                         |
| NP_786937 | Hsp90aa1 | function  | protein homodimerization activity                         |
| NP_786937 | Hsp90aa1 | function  | unfolded protein binding                                  |
| NP_786937 | Hsp90aa1 | function  | unfolded protein binding                                  |
| NP_786937 | Hsp90aa1 | process   | cellular chaperone-mediated protein complex assembly      |
| NP_786937 | Hsp90aa1 | process   | mitochondrial outer membrane translocase complex assembly |
| NP_786937 | Hsp90aa1 | process   | positive regulation of nitric oxide biosynthetic process  |
| NP_786937 | Hsp90aa1 | process   | positive regulation of nitric oxide biosynthetic process  |
| NP_786937 | Hsp90aa1 | process   | protein folding                                           |
| NP_786937 | Hsp90aa1 | process   | protein folding                                           |
| NP_786937 | Hsp90aa1 | process   | response to stress                                        |
| NP_786941 | Psip1    | component | cytosol                                                   |
| NP_786941 | Psip1    | function  | not classified                                            |
| NP_786941 | Psip1    | process   | initiation of viral infection                             |
| NP_786941 | Psip1    | process   | provirus integration                                      |
| NP_789826 | Sept9    | component | cellular_component                                        |
| NP_789826 | Sept9    | component | microtubule                                               |
| NP_789826 | Sept9    | component | perinuclear region of cytoplasm                           |
| NP_789826 | Sept9    | component | stress fiber                                              |
| NP_789826 | Sept9    | function  | ATP binding                                               |
| NP_789826 | Sept9    | function  | DNA binding                                               |
| NP_789826 | Sept9    | function  | DNA topoisomerase (ATP-hydrolyzing) activity              |
| NP_789826 | Sept9    | function  | GTP binding                                               |
| NP_789826 | Sept9    | function  | molecular_function                                        |
| NP_789826 | Sept9    | function  | protein binding                                           |
| NP_789826 | Sept9    | process   | DNA topological change                                    |
| NP_789826 | Sept9    | process   | biological_process                                        |
| NP_789826 | Sept9    | process   | cell cycle                                                |
| NP_789826 | Sept9    | process   | protein heterooligomerization                             |
| NP_808877 | Slc14a2  | component | integral to membrane                                      |
| NP_808877 | Slc14a2  | function  | copper ion binding                                        |
| NP_808877 | Slc14a2  | function  | protein binding                                           |
| NP_808877 | Slc14a2  | function  | urea transmembrane transporter activity                   |
| NP_808877 | Slc14a2  | function  | urea transmembrane transporter activity                   |
| NP_808877 | Slc14a2  | function  | urea transmembrane transporter activity                   |
| NP_808877 | Slc14a2  | process   | oxidation reduction                                       |
| NP_808877 | Slc14a2  | process   | response to water deprivation                             |
| NP_808877 | Slc14a2  | process   | urea transport                                            |
| NP_808877 | Slc14a2  | process   | urea transport                                            |
| NP_835196 | Abca1    | component | Golgi apparatus                                           |
| NP_835196 | Abca1    | component | Golgi apparatus                                           |
| NP_835196 | Abca1    | component | caveola                                                   |
| NP_835196 | Abca1    | component | integral to plasma membrane                               |
| NP_835196 | Abca1    | component | integral to plasma membrane                               |
| NP_835196 | Abca1    | component | intracellular membrane-bounded organelle                  |
| NP_835196 | Abca1    | component | membrane fraction                                         |
| NP_835196 | Abca1    | component | membrane raft                                             |

|           |       |           |                                                                  |
|-----------|-------|-----------|------------------------------------------------------------------|
| NP_835196 | Abca1 | component | phagocytic vesicle                                               |
| NP_835196 | Abca1 | component | plasma membrane                                                  |
| NP_835196 | Abca1 | component | plasma membrane                                                  |
| NP_835196 | Abca1 | component | plasma membrane                                                  |
| NP_835196 | Abca1 | function  | ATP binding                                                      |
| NP_835196 | Abca1 | function  | ATPase activity                                                  |
| NP_835196 | Abca1 | function  | ATPase activity, coupled to transmembrane movement of substances |
| NP_835196 | Abca1 | function  | ATPase activity, coupled to transmembrane movement of substances |
| NP_835196 | Abca1 | function  | anion transmembrane transporter activity                         |
| NP_835196 | Abca1 | function  | anion transmembrane transporter activity                         |
| NP_835196 | Abca1 | function  | apolipoprotein A-I receptor activity                             |
| NP_835196 | Abca1 | function  | cholesterol transporter activity                                 |
| NP_835196 | Abca1 | function  | cholesterol transporter activity                                 |
| NP_835196 | Abca1 | function  | high-density lipoprotein binding                                 |
| NP_835196 | Abca1 | function  | high-density lipoprotein receptor binding                        |
| NP_835196 | Abca1 | function  | nucleotide binding                                               |
| NP_835196 | Abca1 | function  | phospholipid transporter activity                                |
| NP_835196 | Abca1 | function  | phospholipid transporter activity                                |
| NP_835196 | Abca1 | function  | protein binding                                                  |
| NP_835196 | Abca1 | function  | protein binding                                                  |
| NP_835196 | Abca1 | function  | protein binding                                                  |
| NP_835196 | Abca1 | function  | protein binding                                                  |
| NP_835196 | Abca1 | function  | small GTPase binding                                             |
| NP_835196 | Abca1 | function  | syntaxin-13 binding                                              |
| NP_835196 | Abca1 | process   | Cdc42 protein signal transduction                                |
| NP_835196 | Abca1 | process   | G-protein coupled receptor protein signaling pathway             |
| NP_835196 | Abca1 | process   | cholesterol efflux                                               |
| NP_835196 | Abca1 | process   | cholesterol efflux                                               |
| NP_835196 | Abca1 | process   | cholesterol homeostasis                                          |
| NP_835196 | Abca1 | process   | cholesterol metabolic process                                    |
| NP_835196 | Abca1 | process   | cholesterol metabolic process                                    |
| NP_835196 | Abca1 | process   | cholesterol transport                                            |
| NP_835196 | Abca1 | process   | cholesterol transport                                            |
| NP_835196 | Abca1 | process   | cholesterol transport                                            |
| NP_835196 | Abca1 | process   | cholesterol transport                                            |
| NP_835196 | Abca1 | process   | endosome transport                                               |
| NP_835196 | Abca1 | process   | high-density lipoprotein particle assembly                       |
| NP_835196 | Abca1 | process   | interleukin-1 beta secretion                                     |
| NP_835196 | Abca1 | process   | intracellular cholesterol transport                              |
| NP_835196 | Abca1 | process   | lipoprotein biosynthetic process                                 |
| NP_835196 | Abca1 | process   | lipoprotein biosynthetic process                                 |
| NP_835196 | Abca1 | process   | lipoprotein metabolic process                                    |
| NP_835196 | Abca1 | process   | lysosome organization                                            |
| NP_835196 | Abca1 | process   | peptide secretion                                                |
| NP_835196 | Abca1 | process   | peptide secretion                                                |
| NP_835196 | Abca1 | process   | phagocytosis, engulfment                                         |
| NP_835196 | Abca1 | process   | phagocytosis, engulfment                                         |
| NP_835196 | Abca1 | process   | phospholipid efflux                                              |
| NP_835196 | Abca1 | process   | phospholipid efflux                                              |
| NP_835196 | Abca1 | process   | phospholipid homeostasis                                         |
| NP_835196 | Abca1 | process   | phospholipid translocation                                       |
| NP_835196 | Abca1 | process   | phospholipid translocation                                       |
| NP_835196 | Abca1 | process   | phospholipid transport                                           |
| NP_835196 | Abca1 | process   | phospholipid transport                                           |
| NP_835196 | Abca1 | process   | platelet dense granule organization                              |
| NP_835196 | Abca1 | process   | positive regulation of cAMP biosynthetic process                 |
| NP_835196 | Abca1 | process   | protein amino acid lipidation                                    |
| NP_835196 | Abca1 | process   | protein amino acid lipidation                                    |
| NP_835196 | Abca1 | process   | response to drug                                                 |
| NP_835196 | Abca1 | process   | response to nutrient                                             |
| NP_835196 | Abca1 | process   | reverse cholesterol transport                                    |

|              |            |           |                                                             |
|--------------|------------|-----------|-------------------------------------------------------------|
| NP_835196    | Abca1      | process   | reverse cholesterol transport                               |
| XP_001053711 | Nxf3       | component | cytoplasm                                                   |
| XP_001053711 | Nxf3       | component | intracellular                                               |
| XP_001053711 | Nxf3       | component | nuclear RNA export factor complex                           |
| XP_001053711 | Nxf3       | component | nucleus                                                     |
| XP_001053711 | Nxf3       | component | nucleus                                                     |
| XP_001053711 | Nxf3       | function  | mRNA binding                                                |
| XP_001053711 | Nxf3       | function  | nucleotide binding                                          |
| XP_001053711 | Nxf3       | function  | protein binding                                             |
| XP_001053711 | Nxf3       | process   | mRNA transport                                              |
| XP_001053711 | Nxf3       | process   | poly(A)+ mRNA export from nucleus                           |
| XP_001053711 | Nxf3       | process   | transport                                                   |
| XP_001059640 | LOC498453  | component | nucleus                                                     |
| XP_001059640 | LOC498453  | function  | DNA binding                                                 |
| XP_001059640 | LOC498453  | function  | RNA polymerase II transcription factor activity             |
| XP_001059640 | LOC498453  | function  | protein binding                                             |
| XP_001059640 | LOC498453  | function  | transcription elongation regulator activity                 |
| XP_001059640 | LOC498453  | function  | translation elongation factor activity                      |
| XP_001059640 | LOC498453  | function  | zinc ion binding                                            |
| XP_001059640 | LOC498453  | process   | RNA elongation                                              |
| XP_001059640 | LOC498453  | process   | regulation of transcription from RNA polymerase II promoter |
| XP_001071043 | Sntb2      | component | synapse                                                     |
| XP_001071043 | Sntb2      | function  | protein binding                                             |
| XP_001071043 | Sntb2      | process   | not classified                                              |
| XP_001078032 | Ahnak      | component | not classified                                              |
| XP_001078032 | Ahnak      | function  | protein binding                                             |
| XP_001078032 | Ahnak      | process   | not classified                                              |
| XP_237286    | Tns1       | component | not classified                                              |
| XP_237286    | Tns1       | function  | protein binding                                             |
| XP_237286    | Tns1       | process   | intracellular signaling cascade                             |
| XP_341257    | RGD1564174 | component | not classified                                              |
| XP_341257    | RGD1564174 | function  | protein binding                                             |
| XP_341257    | RGD1564174 | process   | intracellular signaling cascade                             |

Statistic: component

|                       |   |
|-----------------------|---|
| cytoplasm             | 9 |
| plasma membrane       | 9 |
| nucleus               | 6 |
| not classified        | 5 |
| integral to membran   | 4 |
| membrane fraction     | 4 |
| perinuclear region o  | 3 |
| apical plasma memt    | 3 |
| Golgi apparatus       | 3 |
| intracellular         | 3 |
| cytosol               | 3 |
| membrane raft         | 3 |
| endoplasmic reticul   | 3 |
| clathrin-coated vesic | 2 |
| cellular_component    | 2 |
| integral to plasma m  | 2 |
| recycling endosome    | 2 |
| rough endoplasmic i   | 2 |
| tight junction        | 2 |
| cell cortex           | 1 |
| postsynaptic density  | 1 |
| mitochondrial memb    | 1 |
| mitochondrial interm  | 1 |
| mitochondrial crista  | 1 |
| melanosome            | 1 |

|                       |     |
|-----------------------|-----|
| membrane              | 1   |
| cell-cell adherens ju | 1   |
| alpha2-beta1 integri  | 1   |
| ribosome              | 1   |
| trans-Golgi network   | 1   |
| gap junction          | 1   |
| axon                  | 1   |
| protein complex       | 1   |
| nuclear RNA export    | 1   |
| caveola               | 1   |
| lysosome              | 1   |
| cell soma             | 1   |
| exocytic vesicle      | 1   |
| early endosome        | 1   |
| cell fraction         | 1   |
| basolateral plasma r  | 1   |
| microtubule           | 1   |
| cytoplasmic membr     | 1   |
| dendrite cytoplasm    | 1   |
| intracellular membr   | 1   |
| stress fiber          | 1   |
| phagocytic vesicle    | 1   |
| cytoplasmic vesicle   | 1   |
| synapse               | 1   |
| dendritic spine       | 1   |
| Total =               | 101 |

|                        |    |
|------------------------|----|
| Statistic: function    |    |
| protein binding        | 22 |
| unfolded protein bin   | 4  |
| ATP binding            | 4  |
| DNA binding            | 3  |
| water channel activi   | 3  |
| protein tyrosine kina  | 3  |
| urea transmembran      | 3  |
| not classified         | 2  |
| nucleotide binding     | 2  |
| zinc ion binding       | 2  |
| protein complex binc   | 2  |
| cholesterol transpor   | 2  |
| nitric-oxide synthase  | 2  |
| anion transmembrar     | 2  |
| ATPase activity, cou   | 2  |
| protein homodimeriz    | 2  |
| phospholipid transp    | 2  |
| lipid binding          | 1  |
| molecular_function     | 1  |
| GTP binding            | 1  |
| DNA topoisomerase      | 1  |
| copper ion binding     | 1  |
| ATPase activity        | 1  |
| TPR domain binding     | 1  |
| RNA polymerase II t    | 1  |
| sugar binding          | 1  |
| calcium ion binding    | 1  |
| protein C-terminus t   | 1  |
| ubiquitin protein liga | 1  |
| receptor binding       | 1  |
| small GTPase bindir    | 1  |
| protein kinase activi  | 1  |

|                       |    |
|-----------------------|----|
| apolipoprotein A-I re | 1  |
| platelet-derived grov | 1  |
| phosphoprotein binc   | 1  |
| kinase activity       | 1  |
| integrin binding      | 1  |
| glycosphingolipid bir | 1  |
| gamma-tubulin bindi   | 1  |
| enzyme binding        | 1  |
| SH3 domain binding    | 1  |
| syntaxin-13 binding   | 1  |
| transporter activity  | 1  |
| translation elongatio | 1  |
| actin binding         | 1  |
| high-density lipoprot | 1  |
| metal ion binding     | 1  |
| mRNA binding          | 1  |
| ARF GTPase activa     | 1  |
| transcription elongat | 1  |
| prostaglandin-E syn   | 1  |
| isomerase activity    | 1  |
| high-density lipoprot | 1  |
| Total =               | 98 |

|                        |   |
|------------------------|---|
| Statistic: process     |   |
| not classified         | 4 |
| intracellular signalin | 4 |
| transport              | 3 |
| water transport        | 3 |
| protein folding        | 3 |
| cholesterol transport  | 3 |
| aging                  | 2 |
| protein amino acid li  | 2 |
| cellular response to   | 2 |
| renal water transpor   | 2 |
| phospholipid transp    | 2 |
| phospholipid translo   | 2 |
| response to hormon     | 2 |
| phospholipid efflux    | 2 |
| phagocytosis, engulf   | 2 |
| peptide secretion      | 2 |
| response to water di   | 2 |
| B cell receptor signa  | 2 |
| lipoprotein biosynthe  | 2 |
| peptidyl-tyrosine ph   | 2 |
| response to drug       | 2 |
| reverse cholesterol t  | 2 |
| positive regulation o  | 2 |
| urea transport         | 2 |
| cholesterol metaboli   | 2 |
| cholesterol efflux     | 2 |
| regulation of transcr  | 1 |
| G-protein coupled re   | 1 |
| Cdc42 protein signa    | 1 |
| cholesterol homeost    | 1 |
| oxidation reduction    | 1 |
| protein heterooligorr  | 1 |
| cell cycle             | 1 |
| biological_process     | 1 |
| DNA topological che    | 1 |
| provirus integration   | 1 |



|                          |   |
|--------------------------|---|
| initiation of viral infe | 1 |
| response to stress       | 1 |
| response to nutrient     | 1 |
| mitochondrial outer i    | 1 |
| cellular chaperone-r     | 1 |
| endosome transport       | 1 |
| response to organic      | 1 |
| regulation of protein    | 1 |
| negative regulation o    | 1 |
| myoblast fusion          | 1 |
| response to toxin        | 1 |
| response to sterol d     | 1 |
| response to protein      | 1 |
| response to peptide      | 1 |
| response to organic      | 1 |
| response to insulin s    | 1 |
| high-density lipoprot    | 1 |
| response to carbohy      | 1 |
| response to axon inj     | 1 |
| response to amino a      | 1 |
| regulation of release    | 1 |
| protein amino acid a     | 1 |
| positive regulation o    | 1 |
| interleukin-1 beta se    | 1 |
| oligodendrocyte dev      | 1 |
| RNA elongation           | 1 |
| histamine secretion      | 1 |
| erythrocyte different    | 1 |
| cytokine secretion       | 1 |
| cellular response to     | 1 |
| cellular response to     | 1 |
| intracellular choleste   | 1 |
| mRNA transport           | 1 |
| water homeostasis        | 1 |
| lipoprotein metabolic    | 1 |
| response to starvati     | 1 |
| response to salt stre    | 1 |
| response to lithium i    | 1 |
| response to lipopoly     | 1 |
| lysosome organizati      | 1 |
| response to glucagc      | 1 |
| response to calcium      | 1 |
| phospholipid homeo       | 1 |
| positive regulation o    | 1 |
| hyperosmotic respoi      | 1 |
| female pregnancy         | 1 |
| platelet dense granu     | 1 |
| cell volume homeos       | 1 |
| apoptosis                | 1 |
| positive regulation o    | 1 |
| actin filament depoly    | 1 |
| poly(A)+ mRNA exp        | 1 |
| spermatogenesis          | 1 |
| regulation of ARF G      | 1 |
| multicellular organis    | 1 |

|                       |     |
|-----------------------|-----|
| cell differentiation  | 1   |
| prostaglandin biosyr  | 1   |
| fatty acid biosynthet | 1   |
| Total =               | 133 |

## GO terms of phosphoproteins increased by dDAVP

| <u>Input</u> | <u>Gene Symbol</u> | <u>GO category</u> | <u>GO Term</u>                               |
|--------------|--------------------|--------------------|----------------------------------------------|
| NP_001019932 | Lrrfip2            | component          | not classified                               |
| NP_001019932 | Lrrfip2            | function           | not classified                               |
| NP_001019932 | Lrrfip2            | process            | Wnt receptor signaling pathway               |
| NP_001093976 | Pctk3              | component          | not classified                               |
| NP_001093976 | Pctk3              | function           | ATP binding                                  |
| NP_001093976 | Pctk3              | function           | cyclin-dependent protein kinase activity     |
| NP_001093976 | Pctk3              | function           | nucleotide binding                           |
| NP_001093976 | Pctk3              | function           | protein binding                              |
| NP_001093976 | Pctk3              | function           | transferase activity                         |
| NP_001093976 | Pctk3              | process            | protein amino acid phosphorylation           |
| NP_001101892 | Plxdc2             | component          | membrane                                     |
| NP_001101892 | Plxdc2             | function           | not classified                               |
| NP_001101892 | Plxdc2             | process            | not classified                               |
| NP_037041    | Aqp2               | component          | apical plasma membrane                       |
| NP_037041    | Aqp2               | component          | apical plasma membrane                       |
| NP_037041    | Aqp2               | component          | apical plasma membrane                       |
| NP_037041    | Aqp2               | component          | basolateral plasma membrane                  |
| NP_037041    | Aqp2               | component          | cell fraction                                |
| NP_037041    | Aqp2               | component          | clathrin-coated vesicle                      |
| NP_037041    | Aqp2               | component          | cytoplasm                                    |
| NP_037041    | Aqp2               | component          | early endosome                               |
| NP_037041    | Aqp2               | component          | exocytic vesicle                             |
| NP_037041    | Aqp2               | component          | integral to membrane                         |
| NP_037041    | Aqp2               | component          | lysosome                                     |
| NP_037041    | Aqp2               | component          | membrane fraction                            |
| NP_037041    | Aqp2               | component          | membrane fraction                            |
| NP_037041    | Aqp2               | component          | plasma membrane                              |
| NP_037041    | Aqp2               | component          | plasma membrane                              |
| NP_037041    | Aqp2               | component          | protein complex                              |
| NP_037041    | Aqp2               | component          | recycling endosome                           |
| NP_037041    | Aqp2               | component          | recycling endosome                           |
| NP_037041    | Aqp2               | component          | rough endoplasmic reticulum                  |
| NP_037041    | Aqp2               | component          | trans-Golgi network                          |
| NP_037041    | Aqp2               | function           | actin binding                                |
| NP_037041    | Aqp2               | function           | protein binding                              |
| NP_037041    | Aqp2               | function           | transporter activity                         |
| NP_037041    | Aqp2               | function           | water channel activity                       |
| NP_037041    | Aqp2               | function           | water channel activity                       |
| NP_037041    | Aqp2               | function           | water channel activity                       |
| NP_037041    | Aqp2               | function           | water channel activity                       |
| NP_037041    | Aqp2               | process            | actin filament depolymerization              |
| NP_037041    | Aqp2               | process            | aging                                        |
| NP_037041    | Aqp2               | process            | apoptosis                                    |
| NP_037041    | Aqp2               | process            | cell volume homeostasis                      |
| NP_037041    | Aqp2               | process            | cellular response to water deprivation       |
| NP_037041    | Aqp2               | process            | cellular response to water deprivation       |
| NP_037041    | Aqp2               | process            | female pregnancy                             |
| NP_037041    | Aqp2               | process            | hyperosmotic response                        |
| NP_037041    | Aqp2               | process            | positive regulation of calcium ion transport |
| NP_037041    | Aqp2               | process            | renal water transport                        |
| NP_037041    | Aqp2               | process            | renal water transport                        |
| NP_037041    | Aqp2               | process            | response to calcium ion                      |
| NP_037041    | Aqp2               | process            | response to glucagon stimulus                |
| NP_037041    | Aqp2               | process            | response to hormone stimulus                 |
| NP_037041    | Aqp2               | process            | response to lipopolysaccharide               |
| NP_037041    | Aqp2               | process            | response to lithium ion                      |
| NP_037041    | Aqp2               | process            | response to salt stress                      |
| NP_037041    | Aqp2               | process            | response to starvation                       |
| NP_037041    | Aqp2               | process            | response to water deprivation                |
| NP_037041    | Aqp2               | process            | transport                                    |
| NP_037041    | Aqp2               | process            | water homeostasis                            |
| NP_037041    | Aqp2               | process            | water transport                              |
| NP_037041    | Aqp2               | process            | water transport                              |
| NP_037041    | Aqp2               | process            | water transport                              |
| NP_062220    | Slc14a2            | component          | integral to membrane                         |
| NP_062220    | Slc14a2            | function           | copper ion binding                           |

|           |         |           |                                              |
|-----------|---------|-----------|----------------------------------------------|
| NP_062220 | Slc14a2 | function  | protein binding                              |
| NP_062220 | Slc14a2 | function  | urea transmembrane transporter activity      |
| NP_062220 | Slc14a2 | function  | urea transmembrane transporter activity      |
| NP_062220 | Slc14a2 | function  | urea transmembrane transporter activity      |
| NP_062220 | Slc14a2 | process   | oxidation reduction                          |
| NP_062220 | Slc14a2 | process   | response to water deprivation                |
| NP_062220 | Slc14a2 | process   | urea transport                               |
| NP_062220 | Slc14a2 | process   | urea transport                               |
| NP_445778 | Pdlim5  | component | Z disc                                       |
| NP_445778 | Pdlim5  | component | actin cytoskeleton                           |
| NP_445778 | Pdlim5  | component | cytosol                                      |
| NP_445778 | Pdlim5  | component | membrane fraction                            |
| NP_445778 | Pdlim5  | function  | actin binding                                |
| NP_445778 | Pdlim5  | function  | actinin binding                              |
| NP_445778 | Pdlim5  | function  | metal ion binding                            |
| NP_445778 | Pdlim5  | function  | protein N-terminus binding                   |
| NP_445778 | Pdlim5  | function  | protein binding                              |
| NP_445778 | Pdlim5  | function  | protein kinase C binding                     |
| NP_445778 | Pdlim5  | function  | receptor signaling complex scaffold activity |
| NP_445778 | Pdlim5  | function  | zinc ion binding                             |
| NP_445778 | Pdlim5  | process   | heart development                            |
| NP_445809 | Ctnnb1  | component | Axin-APC-beta-catenin-GSK3B complex          |
| NP_445809 | Ctnnb1  | component | Z disc                                       |
| NP_445809 | Ctnnb1  | component | Z disc                                       |
| NP_445809 | Ctnnb1  | component | adherens junction                            |
| NP_445809 | Ctnnb1  | component | apical junction complex                      |
| NP_445809 | Ctnnb1  | component | apical junction complex                      |
| NP_445809 | Ctnnb1  | component | apical part of cell                          |
| NP_445809 | Ctnnb1  | component | apical part of cell                          |
| NP_445809 | Ctnnb1  | component | basolateral plasma membrane                  |
| NP_445809 | Ctnnb1  | component | basolateral plasma membrane                  |
| NP_445809 | Ctnnb1  | component | beta-catenin destruction complex             |
| NP_445809 | Ctnnb1  | component | beta-catenin-TCF7L2 complex                  |
| NP_445809 | Ctnnb1  | component | catenin complex                              |
| NP_445809 | Ctnnb1  | component | cell projection membrane                     |
| NP_445809 | Ctnnb1  | component | cell-cell adherens junction                  |
| NP_445809 | Ctnnb1  | component | cell-cell adherens junction                  |
| NP_445809 | Ctnnb1  | component | cell-cell junction                           |
| NP_445809 | Ctnnb1  | component | centrosome                                   |
| NP_445809 | Ctnnb1  | component | cytoplasm                                    |
| NP_445809 | Ctnnb1  | component | cytoplasm                                    |
| NP_445809 | Ctnnb1  | component | cytoplasm                                    |
| NP_445809 | Ctnnb1  | component | cytoskeleton                                 |
| NP_445809 | Ctnnb1  | component | cytosol                                      |
| NP_445809 | Ctnnb1  | component | cytosol                                      |
| NP_445809 | Ctnnb1  | component | dendritic shaft                              |
| NP_445809 | Ctnnb1  | component | fascia adherens                              |
| NP_445809 | Ctnnb1  | component | fascia adherens                              |
| NP_445809 | Ctnnb1  | component | lamellipodium                                |
| NP_445809 | Ctnnb1  | component | lamellipodium                                |
| NP_445809 | Ctnnb1  | component | lateral plasma membrane                      |
| NP_445809 | Ctnnb1  | component | lateral plasma membrane                      |
| NP_445809 | Ctnnb1  | component | membrane                                     |
| NP_445809 | Ctnnb1  | component | membrane fraction                            |
| NP_445809 | Ctnnb1  | component | membrane fraction                            |
| NP_445809 | Ctnnb1  | component | microvillus membrane                         |
| NP_445809 | Ctnnb1  | component | microvillus membrane                         |
| NP_445809 | Ctnnb1  | component | neuron projection                            |
| NP_445809 | Ctnnb1  | component | nucleus                                      |
| NP_445809 | Ctnnb1  | component | nucleus                                      |
| NP_445809 | Ctnnb1  | component | nucleus                                      |
| NP_445809 | Ctnnb1  | component | plasma membrane                              |
| NP_445809 | Ctnnb1  | component | plasma membrane                              |
| NP_445809 | Ctnnb1  | component | protein complex                              |
| NP_445809 | Ctnnb1  | component | synapse                                      |
| NP_445809 | Ctnnb1  | component | transcription factor complex                 |

|           |        |           |                                                     |
|-----------|--------|-----------|-----------------------------------------------------|
| NP_445809 | Cttnb1 | component | transcription factor complex                        |
| NP_445809 | Cttnb1 | function  | DNA binding                                         |
| NP_445809 | Cttnb1 | function  | I-SMAD binding                                      |
| NP_445809 | Cttnb1 | function  | alpha-catenin binding                               |
| NP_445809 | Cttnb1 | function  | alpha-catenin binding                               |
| NP_445809 | Cttnb1 | function  | cadherin binding                                    |
| NP_445809 | Cttnb1 | function  | cadherin binding                                    |
| NP_445809 | Cttnb1 | function  | cadherin binding                                    |
| NP_445809 | Cttnb1 | function  | cadherin binding                                    |
| NP_445809 | Cttnb1 | function  | chromatin binding                                   |
| NP_445809 | Cttnb1 | function  | chromatin binding                                   |
| NP_445809 | Cttnb1 | function  | double-stranded DNA binding                         |
| NP_445809 | Cttnb1 | function  | double-stranded DNA binding                         |
| NP_445809 | Cttnb1 | function  | kinase binding                                      |
| NP_445809 | Cttnb1 | function  | promoter binding                                    |
| NP_445809 | Cttnb1 | function  | protein C-terminus binding                          |
| NP_445809 | Cttnb1 | function  | protein binding                                     |
| NP_445809 | Cttnb1 | function  | protein binding                                     |
| NP_445809 | Cttnb1 | function  | protein binding                                     |
| NP_445809 | Cttnb1 | function  | protein phosphatase binding                         |
| NP_445809 | Cttnb1 | function  | protein phosphatase binding                         |
| NP_445809 | Cttnb1 | function  | transcription activator activity                    |
| NP_445809 | Cttnb1 | function  | transcription coactivator activity                  |
| NP_445809 | Cttnb1 | function  | transcription coactivator activity                  |
| NP_445809 | Cttnb1 | function  | transcription factor activity                       |
| NP_445809 | Cttnb1 | function  | transcription factor activity                       |
| NP_445809 | Cttnb1 | function  | transcription factor binding                        |
| NP_445809 | Cttnb1 | function  | transcription factor binding                        |
| NP_445809 | Cttnb1 | process   | Schwann cell proliferation                          |
| NP_445809 | Cttnb1 | process   | T cell differentiation in the thymus                |
| NP_445809 | Cttnb1 | process   | T cell differentiation in the thymus                |
| NP_445809 | Cttnb1 | process   | Wnt receptor signaling pathway                      |
| NP_445809 | Cttnb1 | process   | Wnt receptor signaling pathway through beta-catenin |
| NP_445809 | Cttnb1 | process   | Wnt receptor signaling pathway through beta-catenin |
| NP_445809 | Cttnb1 | process   | anterior/posterior axis specification               |
| NP_445809 | Cttnb1 | process   | anterior/posterior axis specification               |
| NP_445809 | Cttnb1 | process   | apoptosis                                           |
| NP_445809 | Cttnb1 | process   | apoptosis                                           |
| NP_445809 | Cttnb1 | process   | bone resorption                                     |
| NP_445809 | Cttnb1 | process   | bone resorption                                     |
| NP_445809 | Cttnb1 | process   | camera-type eye morphogenesis                       |
| NP_445809 | Cttnb1 | process   | camera-type eye morphogenesis                       |
| NP_445809 | Cttnb1 | process   | cell differentiation                                |
| NP_445809 | Cttnb1 | process   | cell fate determination                             |
| NP_445809 | Cttnb1 | process   | cell fate specification                             |
| NP_445809 | Cttnb1 | process   | cell fate specification                             |
| NP_445809 | Cttnb1 | process   | cell maturation                                     |
| NP_445809 | Cttnb1 | process   | cell maturation                                     |
| NP_445809 | Cttnb1 | process   | cell morphogenesis involved in differentiation      |
| NP_445809 | Cttnb1 | process   | cell morphogenesis involved in differentiation      |
| NP_445809 | Cttnb1 | process   | cell proliferation                                  |
| NP_445809 | Cttnb1 | process   | cell-cell adhesion                                  |
| NP_445809 | Cttnb1 | process   | cell-cell adhesion                                  |
| NP_445809 | Cttnb1 | process   | cell-cell adhesion                                  |
| NP_445809 | Cttnb1 | process   | cell-matrix adhesion                                |
| NP_445809 | Cttnb1 | process   | cell-matrix adhesion                                |
| NP_445809 | Cttnb1 | process   | cellular process                                    |
| NP_445809 | Cttnb1 | process   | cellular protein localization                       |
| NP_445809 | Cttnb1 | process   | cellular protein localization                       |
| NP_445809 | Cttnb1 | process   | dorsal/ventral axis specification                   |
| NP_445809 | Cttnb1 | process   | dorsal/ventral axis specification                   |
| NP_445809 | Cttnb1 | process   | dorsal/ventral pattern formation                    |
| NP_445809 | Cttnb1 | process   | ectoderm development                                |
| NP_445809 | Cttnb1 | process   | ectoderm development                                |
| NP_445809 | Cttnb1 | process   | embryonic arm morphogenesis                         |
| NP_445809 | Cttnb1 | process   | embryonic arm morphogenesis                         |

|           |        |         |                                                                                             |
|-----------|--------|---------|---------------------------------------------------------------------------------------------|
| NP_445809 | Ctnnb1 | process | embryonic digit morphogenesis                                                               |
| NP_445809 | Ctnnb1 | process | embryonic digit morphogenesis                                                               |
| NP_445809 | Ctnnb1 | process | embryonic hindlimb morphogenesis                                                            |
| NP_445809 | Ctnnb1 | process | embryonic hindlimb morphogenesis                                                            |
| NP_445809 | Ctnnb1 | process | endoderm formation                                                                          |
| NP_445809 | Ctnnb1 | process | endodermal cell fate commitment                                                             |
| NP_445809 | Ctnnb1 | process | endodermal cell fate commitment                                                             |
| NP_445809 | Ctnnb1 | process | epithelial cell differentiation involved in prostate gland development                      |
| NP_445809 | Ctnnb1 | process | forebrain development                                                                       |
| NP_445809 | Ctnnb1 | process | forebrain development                                                                       |
| NP_445809 | Ctnnb1 | process | gastrulation with mouth forming second                                                      |
| NP_445809 | Ctnnb1 | process | gastrulation with mouth forming second                                                      |
| NP_445809 | Ctnnb1 | process | glial cell fate determination                                                               |
| NP_445809 | Ctnnb1 | process | glial cell fate determination                                                               |
| NP_445809 | Ctnnb1 | process | heart development                                                                           |
| NP_445809 | Ctnnb1 | process | heart development                                                                           |
| NP_445809 | Ctnnb1 | process | hemopoiesis                                                                                 |
| NP_445809 | Ctnnb1 | process | hemopoiesis                                                                                 |
| NP_445809 | Ctnnb1 | process | liver development                                                                           |
| NP_445809 | Ctnnb1 | process | lung development                                                                            |
| NP_445809 | Ctnnb1 | process | lung development                                                                            |
| NP_445809 | Ctnnb1 | process | midgut development                                                                          |
| NP_445809 | Ctnnb1 | process | morphogenesis of embryonic epithelium                                                       |
| NP_445809 | Ctnnb1 | process | morphogenesis of embryonic epithelium                                                       |
| NP_445809 | Ctnnb1 | process | myoblast differentiation                                                                    |
| NP_445809 | Ctnnb1 | process | negative regulation of cell differentiation                                                 |
| NP_445809 | Ctnnb1 | process | negative regulation of chondrocyte differentiation                                          |
| NP_445809 | Ctnnb1 | process | negative regulation of chondrocyte differentiation                                          |
| NP_445809 | Ctnnb1 | process | negative regulation of osteoclast differentiation                                           |
| NP_445809 | Ctnnb1 | process | negative regulation of osteoclast differentiation                                           |
| NP_445809 | Ctnnb1 | process | negative regulation of transcription from RNA polymerase II promoter                        |
| NP_445809 | Ctnnb1 | process | negative regulation of transcription from RNA polymerase II promoter                        |
| NP_445809 | Ctnnb1 | process | negative regulation of transcription, DNA-dependent                                         |
| NP_445809 | Ctnnb1 | process | odontogenesis of dentine-containing tooth                                                   |
| NP_445809 | Ctnnb1 | process | odontogenesis of dentine-containing tooth                                                   |
| NP_445809 | Ctnnb1 | process | odontogenesis of dentine-containing tooth                                                   |
| NP_445809 | Ctnnb1 | process | osteoclast differentiation                                                                  |
| NP_445809 | Ctnnb1 | process | pancreas development                                                                        |
| NP_445809 | Ctnnb1 | process | pancreas development                                                                        |
| NP_445809 | Ctnnb1 | process | patterning of blood vessels                                                                 |
| NP_445809 | Ctnnb1 | process | patterning of blood vessels                                                                 |
| NP_445809 | Ctnnb1 | process | positive regulation of MAPKKK cascade                                                       |
| NP_445809 | Ctnnb1 | process | positive regulation of MAPKKK cascade                                                       |
| NP_445809 | Ctnnb1 | process | positive regulation of epithelial cell differentiation                                      |
| NP_445809 | Ctnnb1 | process | positive regulation of epithelial cell differentiation                                      |
| NP_445809 | Ctnnb1 | process | positive regulation of epithelial cell proliferation involved in prostate gland development |
| NP_445809 | Ctnnb1 | process | positive regulation of gene-specific transcription from RNA polymerase II promoter          |
| NP_445809 | Ctnnb1 | process | positive regulation of heparan sulfate proteoglycan biosynthetic process                    |
| NP_445809 | Ctnnb1 | process | positive regulation of osteoblast differentiation                                           |
| NP_445809 | Ctnnb1 | process | positive regulation of osteoblast differentiation                                           |
| NP_445809 | Ctnnb1 | process | positive regulation of transcription                                                        |
| NP_445809 | Ctnnb1 | process | positive regulation of transcription from RNA polymerase II promoter                        |
| NP_445809 | Ctnnb1 | process | positive regulation of transcription from RNA polymerase II promoter                        |
| NP_445809 | Ctnnb1 | process | positive regulation of transcription, DNA-dependent                                         |
| NP_445809 | Ctnnb1 | process | protein heterooligomerization                                                               |
| NP_445809 | Ctnnb1 | process | proximal/distal pattern formation                                                           |
| NP_445809 | Ctnnb1 | process | proximal/distal pattern formation                                                           |
| NP_445809 | Ctnnb1 | process | regulation of cell differentiation                                                          |
| NP_445809 | Ctnnb1 | process | regulation of cell proliferation                                                            |
| NP_445809 | Ctnnb1 | process | regulation of cell proliferation                                                            |
| NP_445809 | Ctnnb1 | process | regulation of centriole-centriole cohesion                                                  |
| NP_445809 | Ctnnb1 | process | regulation of epithelial cell differentiation                                               |
| NP_445809 | Ctnnb1 | process | regulation of osteoblast differentiation                                                    |
| NP_445809 | Ctnnb1 | process | regulation of osteoclast differentiation                                                    |
| NP_445809 | Ctnnb1 | process | regulation of transcription                                                                 |
| NP_445809 | Ctnnb1 | process | regulation of transcription, DNA-dependent                                                  |

|              |          |           |                                            |
|--------------|----------|-----------|--------------------------------------------|
| NP_445809    | Ctnnb1   | process   | response to cadmium ion                    |
| NP_445809    | Ctnnb1   | process   | response to cytokine stimulus              |
| NP_445809    | Ctnnb1   | process   | response to estrogen stimulus              |
| NP_445809    | Ctnnb1   | process   | response to hormone stimulus               |
| NP_445809    | Ctnnb1   | process   | response to organic cyclic substance       |
| NP_445809    | Ctnnb1   | process   | skeletal system development                |
| NP_445809    | Ctnnb1   | process   | skeletal system development                |
| NP_445809    | Ctnnb1   | process   | synapse organization                       |
| NP_445809    | Ctnnb1   | process   | synapse organization                       |
| NP_445809    | Ctnnb1   | process   | synaptic transmission                      |
| NP_445809    | Ctnnb1   | process   | synaptic transmission                      |
| NP_445809    | Ctnnb1   | process   | synaptic vesicle transport                 |
| NP_445809    | Ctnnb1   | process   | synaptic vesicle transport                 |
| NP_445809    | Ctnnb1   | process   | thymus development                         |
| NP_445809    | Ctnnb1   | process   | thymus development                         |
| NP_690003    | Carhsp1  | component | cytoplasm                                  |
| NP_690003    | Carhsp1  | component | cytosol                                    |
| NP_690003    | Carhsp1  | function  | DNA binding                                |
| NP_690003    | Carhsp1  | function  | protein binding                            |
| NP_690003    | Carhsp1  | function  | protein binding                            |
| NP_690003    | Carhsp1  | function  | protein binding                            |
| NP_690003    | Carhsp1  | process   | calcium-mediated signaling                 |
| NP_690003    | Carhsp1  | process   | regulation of transcription, DNA-dependent |
| NP_998791    | kif13B   | component | microtubule                                |
| NP_998791    | kif13B   | function  | ATP binding                                |
| NP_998791    | kif13B   | function  | microtubule motor activity                 |
| NP_998791    | kif13B   | function  | nucleotide binding                         |
| NP_998791    | kif13B   | process   | microtubule-based movement                 |
| XP_001078032 | Ahnak    | component | not classified                             |
| XP_001078032 | Ahnak    | function  | protein binding                            |
| XP_001078032 | Ahnak    | process   | not classified                             |
| XP_215763    | Tnks1bp1 | component | not classified                             |
| XP_215763    | Tnks1bp1 | function  | not classified                             |
| XP_215763    | Tnks1bp1 | process   | not classified                             |
| XP_225259    | Dsp      | component | adherens junction                          |
| XP_225259    | Dsp      | component | basolateral plasma membrane                |
| XP_225259    | Dsp      | component | basolateral plasma membrane                |
| XP_225259    | Dsp      | component | cornified envelope                         |
| XP_225259    | Dsp      | component | desmosome                                  |
| XP_225259    | Dsp      | component | desmosome                                  |
| XP_225259    | Dsp      | component | desmosome                                  |
| XP_225259    | Dsp      | component | fascia adherens                            |
| XP_225259    | Dsp      | component | mitochondrion                              |
| XP_225259    | Dsp      | component | mitochondrion                              |
| XP_225259    | Dsp      | component | plasma membrane                            |
| XP_225259    | Dsp      | function  | protein binding, bridging                  |
| XP_225259    | Dsp      | process   | keratinocyte differentiation               |
| XP_225259    | Dsp      | process   | peptide cross-linking                      |
| XP_225259    | Dsp      | process   | wound healing                              |

Statistic: component

|                      |   |
|----------------------|---|
| basolateral plasma   | 5 |
| cytoplasm            | 5 |
| membrane fraction    | 5 |
| plasma membrane      | 5 |
| not classified       | 4 |
| cytosol              | 4 |
| apical plasma mem    | 3 |
| nucleus              | 3 |
| desmosome            | 3 |
| Z disc               | 3 |
| fascia adherens      | 3 |
| transcription factor | 2 |
| lamellipodium        | 2 |
| membrane             | 2 |
| mitochondrion        | 2 |

|                      |    |
|----------------------|----|
| microvillus membra   | 2  |
| integral to membra   | 2  |
| cell-cell adherens j | 2  |
| protein complex      | 2  |
| recycling endosom    | 2  |
| lateral plasma merr  | 2  |
| adherens junction    | 2  |
| apical part of cell  | 2  |
| apical junction com  | 2  |
| dendritic shaft      | 1  |
| Axin-APC-beta-cate   | 1  |
| synapse              | 1  |
| actin cytoskeleton   | 1  |
| beta-catenin destru  | 1  |
| trans-Golgi network  | 1  |
| rough endoplasmic    | 1  |
| beta-catenin-TCF7I   | 1  |
| catenin complex      | 1  |
| microtubule          | 1  |
| cornified envelope   | 1  |
| lysosome             | 1  |
| cell projection mem  | 1  |
| exocytic vesicle     | 1  |
| early endosome       | 1  |
| cell-cell junction   | 1  |
| clathrin-coated vesi | 1  |
| cell fraction        | 1  |
| centrosome           | 1  |
| neuron projection    | 1  |
| cytoskeleton         | 1  |
| Total =              | 90 |

|                       |    |
|-----------------------|----|
| Statistic: function   |    |
| protein binding       | 11 |
| cadherin binding      | 4  |
| not classified        | 3  |
| water channel activ   | 3  |
| urea transmembrar     | 3  |
| transcription factor  | 2  |
| ATP binding           | 2  |
| protein phosphatas    | 2  |
| nucleotide binding    | 2  |
| actin binding         | 2  |
| transcription factor  | 2  |
| double-stranded DN    | 2  |
| chromatin binding     | 2  |
| transcription coacti  | 2  |
| alpha-catenin bindi   | 2  |
| DNA binding           | 2  |
| transcription activat | 1  |
| zinc ion binding      | 1  |
| receptor signaling c  | 1  |
| protein kinase C bir  | 1  |
| protein N-terminus    | 1  |
| metal ion binding     | 1  |
| actinin binding       | 1  |
| I-SMAD binding        | 1  |
| copper ion binding    | 1  |
| microtubule motor     | 1  |
| transporter activity  | 1  |
| kinase binding        | 1  |
| transferase activity  | 1  |
| protein binding, brie | 1  |
| promoter binding      | 1  |
| cyclin-dependent p    | 1  |
| protein C-terminus    | 1  |



Total = 63

|                         |   |
|-------------------------|---|
| Statistic: process      |   |
| not classified          | 3 |
| apoptosis               | 3 |
| water transport         | 3 |
| heart development       | 3 |
| cell-cell adhesion      | 3 |
| odontogenesis of d      | 3 |
| Wnt receptor signal     | 2 |
| synaptic vesicle tra    | 2 |
| synaptic transmissi     | 2 |
| synapse organizati      | 2 |
| skeletal system dev     | 2 |
| cellular response to    | 2 |
| renal water transpo     | 2 |
| response to hormo       | 2 |
| response to water c     | 2 |
| regulation of transc    | 2 |
| urea transport          | 2 |
| T cell differentiation  | 2 |
| Wnt receptor signal     | 2 |
| anterior/posterior a:   | 2 |
| bone resorption         | 2 |
| regulation of cell pr   | 2 |
| camera-type eye m       | 2 |
| proximal/distal patte   | 2 |
| cell fate specificatio  | 2 |
| cell maturation         | 2 |
| positive regulation o   | 2 |
| cell morphogenesis      | 2 |
| positive regulation o   | 2 |
| cell-matrix adhesio     | 2 |
| cellular protein loca   | 2 |
| dorsal/ventral axis     | 2 |
| positive regulation o   | 2 |
| positive regulation o   | 2 |
| patterning of blood     | 2 |
| pancreas developm       | 2 |
| ectoderm developm       | 2 |
| thymus developm         | 2 |
| embryonic arm mor       | 2 |
| negative regulation     | 2 |
| negative regulation     | 2 |
| negative regulation     | 2 |
| embryonic digit mor     | 2 |
| embryonic hindlimb      | 2 |
| morphogenesis of e      | 2 |
| endodermal cell fat     | 2 |
| lung development        | 2 |
| forebrain developm      | 2 |
| hemopoiesis             | 2 |
| glial cell fate deter   | 2 |
| gastrulation with m     | 2 |
| response to organic     | 1 |
| epithelial cell differe | 1 |
| liver development       | 1 |
| endoderm formatio       | 1 |
| midgut developm         | 1 |
| myoblast differentia    | 1 |
| negative regulation     | 1 |
| negative regulation     | 1 |
| dorsal/ventral patte    | 1 |
| osteoclast differenti   | 1 |
| positive regulation o   | 1 |
| cellular process        | 1 |

|                        |     |
|------------------------|-----|
| positive regulation of | 1   |
| calcium-mediated s     | 1   |
| cell proliferation     | 1   |
| positive regulation of | 1   |
| positive regulation of | 1   |
| positive regulation of | 1   |
| cell fate determinat   | 1   |
| cell differentiation   | 1   |
| protein heterooligor   | 1   |
| regulation of cell dif | 1   |
| regulation of centric  | 1   |
| regulation of epithe   | 1   |
| regulation of osteot   | 1   |
| Schwann cell prolif    | 1   |
| microtubule-based      | 1   |
| regulation of osteoc   | 1   |
| oxidation reduction    | 1   |
| keratinocyte differe   | 1   |
| water homeostasis      | 1   |
| transport              | 1   |
| regulation of transc   | 1   |
| response to starvat    | 1   |
| response to salt str   | 1   |
| response to lithium    | 1   |
| response to lipopol    | 1   |
| response to cadmi      | 1   |
| response to glucag     | 1   |
| response to calciun    | 1   |
| response to cytokin    | 1   |
| positive regulation of | 1   |
| hyperosmotic resp      | 1   |
| female pregnancy       | 1   |
| response to estrog     | 1   |
| cell volume homeos     | 1   |
| peptide cross-linkin   | 1   |
| aging                  | 1   |
| actin filament depol   | 1   |
| wound healing          | 1   |
| protein amino acid     | 1   |
| Total =                | 159 |

# Conserved domain analysis of phosphoproteins decreased by dDAVP

| Input        | Protein Name       | CDD        | Conserved Domain |
|--------------|--------------------|------------|------------------|
| NP_001019962 | epsin 3            | cd03571    | ENTH_epsin       |
| NP_001019962 | epsin 3            | PRK07764   | PRK07764         |
| NP_001101454 | PDLIM1 interacti   | cd00180    | S_TKc            |
| NP_001101454 | PDLIM1 interacti   | smart00220 | S_TKc            |
| NP_001101454 | PDLIM1 interacti   | cd00180    | S_TKc            |
| NP_001101454 | PDLIM1 interacti   | smart00220 | S_TKc            |
| NP_001101454 | PDLIM1 interacti   | cd00180    | S_TKc            |
| NP_001101454 | PDLIM1 interacti   | smart00220 | S_TKc            |
| NP_001101454 | PDLIM1 interacti   | cd00180    | S_TKc            |
| NP_001101454 | PDLIM1 interacti   | smart00220 | S_TKc            |
| NP_001101454 | PDLIM1 interacti   | cd00180    | S_TKc            |
| NP_001124461 | prostaglandin-E    | cd00237    | p23              |
| NP_001129068 | ArfGAP with FG     | cl02464    | ArfGap           |
| NP_037041    | aquaporin 2 (coll  | cd00333    | MIP              |
| NP_110484    | Yamaguchi sarxc    | cd00173    | SH2              |
| NP_110484    | Yamaguchi sarxc    | cd00174    | SH3              |
| NP_110484    | Yamaguchi sarxc    | pfam07714  | Pkinase_Tyr      |
| NP_110484    | Yamaguchi sarxc    | cd05034    | PTKc_Src_like    |
| NP_445747    | calpastatin isofor | pfam00748  | Calpain_inhib    |
| NP_446225    | tight junction pro | cd00992    | PDZ_signaling    |
| NP_446225    | tight junction pro | smart00072 | GuKc             |
| NP_446225    | tight junction pro | cl09099    | P-loop NTPase    |
| NP_446225    | tight junction pro | cl09950    | SH3              |
| NP_742005    | calnexin precursr  | pfam00262  | Calreticulin     |
| NP_786937    | heat shock prote   | pfam00183  | HSP90            |
| NP_786937    | heat shock prote   | cl00075    | HATPase_c        |
| NP_786941    | PC4 and SFRS1      | cd05834    | HDGF_related     |
| NP_789826    | septin 9 isoform   | cd01850    | CDC_Septin       |
| NP_808877    | solute carrier fan | cl01829    | UT               |
| NP_835196    | ATP-binding cas    | cd03263    | ABC_subfamily_A  |
| NP_835196    | ATP-binding cas    | TIGR01257  | rim_protein      |
| XP_001053711 |                    | pfam09162  | Tap-RNA_bind     |
| XP_001053711 |                    | cl04338    | TAP_C            |
| XP_001053711 |                    | cl09109    | NTF2_like        |
| XP_001059640 |                    | cd00183    | TFIIS_I          |
| XP_001059640 |                    | TIGR01385  | TFSII            |
| XP_001059640 |                    | cl02609    | TFIIS_C          |
| XP_001059640 |                    | cl02637    | TFIIS_M          |
| XP_001059640 |                    | cd00183    | TFIIS_I          |
| XP_001059640 |                    | TIGR01385  | TFSII            |
| XP_001059640 |                    | cl02609    | TFIIS_C          |
| XP_001059640 |                    | cl02637    | TFIIS_M          |
| XP_001071043 |                    | cd00992    | PDZ_signaling    |
| XP_001071043 |                    | cd01258    | PH_syntrophin    |
| XP_001071043 |                    | cd00992    | PDZ_signaling    |
| XP_001071043 |                    | cd01258    | PH_syntrophin    |
| XP_237286    |                    | cd00173    | SH2              |
| XP_237286    |                    | pfam10409  | PTEN_C2          |
| XP_237286    |                    | cl00053    | PTPc             |
| XP_237286    |                    | cl00273    | PH-like          |
| XP_237286    |                    | cd00173    | SH2              |
| XP_237286    |                    | pfam10409  | PTEN_C2          |
| XP_237286    |                    | cl00053    | PTPc             |
| XP_237286    |                    | cl00273    | PH-like          |
| XP_341257    |                    | pfam10409  | PTEN_C2          |
| XP_341257    |                    | cl00053    | PTPc             |
| XP_341257    |                    | cd00173    | SH2              |
| XP_341257    |                    | cl00273    | PH-like          |
| XP_341257    |                    | cd00029    | C1               |
| XP_341257    |                    | cd00173    | SH2              |
| XP_341257    |                    | cd01213    | tensin           |
| XP_341257    |                    | pfam10409  | PTEN_C2          |
| XP_341257    |                    | cl00053    | PTPc             |

Statistic: conserved domain

|                 |   |
|-----------------|---|
| S_TKc           | 8 |
| SH2             | 5 |
| PTEN_C2         | 4 |
| PTPc            | 4 |
| PDZ_signaling   | 3 |
| PH-like         | 3 |
| SH3             | 2 |
| TFIIS_M         | 2 |
| TFIIS_C         | 2 |
| TFSII           | 2 |
| TFIIS_I         | 2 |
| PH_syntrophin   | 2 |
| ENTH_epsin      | 1 |
| Tap-RNA_bind    | 1 |
| rim_protein     | 1 |
| ABC_subfamily_A | 1 |
| UT              | 1 |
| CDC_Septin      | 1 |
| HDGF_related    | 1 |
| HATPase_c       | 1 |
| HSP90           | 1 |
| Calreticulin    | 1 |
| P-loop NTPase   | 1 |
| GuKc            | 1 |
| TAP_C           | 1 |
| Calpain_inhib   | 1 |

|               |    |
|---------------|----|
| PTKc_Src_like | 1  |
| Pkinase_Tyr   | 1  |
| NTF2_like     | 1  |
| C1            | 1  |
| MIP           | 1  |
| ArfGap        | 1  |
| p23           | 1  |
| tensin        | 1  |
| PRK07764      | 1  |
| Total =       | 62 |

## Conserved domain analysis of phosphoproteins increased by dDAVP

| Input        | Protein Name       | CDD        | Conserved Domain |
|--------------|--------------------|------------|------------------|
| NP_001019932 | leucine rich repea | pfam09738  | DUF2051          |
| NP_001093976 | PCTAIRE protein    | cd00180    | S_TKc            |
| NP_001093976 | PCTAIRE protein    | smart00220 | S_TKc            |
| NP_001093976 | PCTAIRE protein    | cd00180    | S_TKc            |
| NP_001093976 | PCTAIRE protein    | smart00220 | S_TKc            |
| NP_001093976 | PCTAIRE protein    | cd00180    | S_TKc            |
| NP_001093976 | PCTAIRE protein    | smart00220 | S_TKc            |
| NP_001101892 | plexin domain cor  | cl02601    | PSI              |
| NP_001101892 | plexin domain cor  | cl02648    | NIDO             |
| NP_001101892 | plexin domain cor  | cl02601    | PSI              |
| NP_001101892 | plexin domain cor  | cl02648    | NIDO             |
| NP_001101892 | plexin domain cor  | cl02601    | PSI              |
| NP_001101892 | plexin domain cor  | cl02648    | NIDO             |
| NP_037041    | aquaporin 2 (colle | cd00333    | MIP              |
| NP_062220    | solute carrier fam | cl01829    | UT               |
| NP_062220    | solute carrier fam | cl01829    | UT               |
| NP_445778    | PDZ and LIM don    | cd00992    | PDZ_signaling    |
| NP_445778    | PDZ and LIM don    | cl02475    | LIM              |
| NP_445809    | beta-catenin       | cd00020    | ARM              |
| NP_445809    | beta-catenin       | cl02500    | ARM              |
| NP_690003    | calcium regulated  | cd04458    | CSP_CDS          |
| NP_998791    | kinesin 13B        | cd00060    | FHA              |
| NP_998791    | kinesin 13B        | cd01365    | KISc_KIF1A_KIF1B |
| NP_998791    | kinesin 13B        | pfam01302  | CAP_GLY          |
| XP_215763    |                    | null       | null             |
| XP_225259    |                    | COG1196    | Smc              |
| XP_225259    |                    | cl02531    | Plectin          |
| XP_225259    |                    | cd00176    | SPEC             |
| XP_225259    |                    | TIGR02168  | SMC_prok_B       |
| XP_225259    |                    | cl02531    | Plectin          |
| XP_225259    |                    | COG1196    | Smc              |
| XP_225259    |                    | cl02531    | Plectin          |
| XP_225259    |                    | cd00176    | SPEC             |
| XP_225259    |                    | TIGR02168  | SMC_prok_B       |
| XP_225259    |                    | cl02531    | Plectin          |

Statistic: conserved domain

|                |    |
|----------------|----|
| S_TKc          | 6  |
| Plectin        | 4  |
| PSI            | 3  |
| NIDO           | 3  |
| SMC_prok_B     | 2  |
| SPEC           | 2  |
| Smc            | 2  |
| UT             | 2  |
| ARM            | 2  |
| DUF2051        | 1  |
| CSP_CDS        | 1  |
| LIM            | 1  |
| PDZ_signaling  | 1  |
| FHA            | 1  |
| MIP            | 1  |
| KISc_KIF1A_KIF | 1  |
| CAP_GLY        | 1  |
| null           | 1  |
| Total =        | 35 |
